# Asymmetries around the visual field: From retina to cortex to behavior

## Authors

Eline R. Kupers<sup>1,2,3\*</sup>, Noah C. Benson<sup>1,2,4</sup>, Marisa Carrasco<sup>1,2</sup>, Jonathan Winawer<sup>1,2</sup>

## Affiliations

<sup>1</sup> Dept. of Psychology, New York University, New York, NY 10003

<sup>2</sup> Center for Neural Sciences, New York University, New York, NY 10003

<sup>3</sup> Current affiliation: Department of Psychology, Stanford University, Stanford, CA, 94305

<sup>4</sup> Current affiliation: eScience Institute, University of Washington, Seattle, WA, 98195

\* Corresponding author. Email to: [eline.kupers@nyu.edu](mailto:eline.kupers@nyu.edu)

## Funding

This work was supported by NIH R01-EY027401 to MC and JW.

## Acknowledgements

We thank Michael Landy and Brian Wandell for their useful comments.

# 1 Abstract

2 Visual performance varies around the visual field. It is best near the fovea compared to the  
3 periphery, and at iso-eccentric locations it is best on the horizontal, intermediate on the lower,  
4 and poorest on the upper meridian. The fovea-to-periphery performance decline is linked to the  
5 decreases in cone density, retinal ganglion cell (RGC) density, and V1 cortical magnification  
6 factor (CMF) as eccentricity increases. The origins of polar angle asymmetries are not well  
7 understood. Optical quality and cone density vary across the retina, but recent computational  
8 modeling has shown that these factors can only account for a small percentage of behavior.  
9 Here, we investigate how visual processing beyond the cone photon absorptions contributes to  
10 polar angle asymmetries in performance. First, we quantify the extent of asymmetries in cone  
11 density, midlevel RGC density, and V1 CMF. We find that both polar angle asymmetries and  
12 eccentricity gradients increase from cones to mRGCs, and from mRGCs to cortex. Second, we  
13 extend our previously published computational observer model to quantify the contribution of  
14 phototransduction by the cones and spatial filtering by mRGCs to behavioral asymmetries.  
15 Starting with photons emitted by a visual display, the model simulates the effect of human  
16 optics, cone isomerizations, phototransduction, and mRGC spatial filtering. The model performs  
17 a forced choice orientation discrimination task on mRGC responses using a linear support  
18 vector machine classifier. The model shows that asymmetries in a decision-maker's  
19 performance across polar angle are greater when assessing the photocurrents than when  
20 assessing isomerizations and are greater still when assessing mRGC signals. Nonetheless, the  
21 polar angle asymmetries of the mRGC outputs are still considerably smaller than those  
22 observed from human performance. We conclude that cone isomerizations, phototransduction  
23 and the spatial filtering properties of mRGCs contribute to polar angle performance differences,  
24 but that a full account of these differences will entail additional contribution from cortical  
25 representations.

## 26 Introduction

27 Visual performance is not uniform across the visual field. The most well-known effect is a  
28 decrease in visual acuity as a function of eccentricity: we see more poorly in the periphery  
29 compared to the center of gaze [1-4]. This observed difference in visual performance has been  
30 attributed to several physiological factors, starting as early as the distribution of photoreceptors  
31 [5, 6]. In the human fovea, the cones are tightly packed such that visual input is encoded at high  
32 spatial resolution. In peripheral retinal locations, cones are larger and interspersed among rods,  
33 resulting in a drastically lower density [7-10]; hence a decrease in spatial resolution.

34 Visual performance also differs as a function of polar angle. At matched eccentricity,  
35 performance is better along the horizontal than vertical visual meridian (horizontal-vertical  
36 anisotropy or “HVA”, *e.g.*, [11-16]) and better along the lower than upper vertical visual meridian  
37 (vertical-meridian asymmetry or “VMA”, *e.g.*, [12-18]). These polar angle asymmetries are  
38 observed in many different visual tasks, such as those mediated by contrast sensitivity [12-15,  
39 19-31] and spatial resolution [11, 16, 17, 19, 20, 32-34], contrast appearance [35], visual search  
40 [36-44], crowding [44-47], and tasks that are thought to recruit higher visual areas such as  
41 visual working memory [34]. Covert spatial attention improves performance similarly at all iso-  
42 eccentric stimulus locations, thus it does not eliminate the polar angle asymmetries [12, 13, 48,  
43 49].

44 These polar angle effects can be large. For instance, for a Gabor patch at 4.5°  
45 eccentricity with a spatial frequency of 4 cycles per degree, contrast thresholds are close to  
46 double for the upper vertical meridian compared to the horizontal meridian [12, 13, 15]. This is  
47 an effect size similar to doubling stimulus’ eccentricity from 4.5° to 9° on the horizontal axis [15,  
48 20]. Additionally, these performance differences are retinotopic, shifting in line with the retinal  
49 location of the stimulus rather than its location in space [14].

50 The visual system has polar angle asymmetries from its earliest stages, including in the  
51 optics and cone density. In a computational observer model that tracked information from the  
52 photons in the scene through the optics and cone isomerizations, variations in optical quality  
53 and cone density accounted for less than 10% of the observed polar angle asymmetries in a  
54 contrast threshold task [50]. This leads to the question, what additional factors later in the visual  
55 processing stream give rise to visual performance differences with polar angle?

56 One possibility is that even without additional asymmetries in cell density, later  
57 processing could exacerbate the earlier asymmetries. For example, the larger cone apertures

58 observed at lower cone densities result in greater downregulation of the cone photocurrent [51],  
59 hence this decrease in signal-to-noise ratio might exacerbate polar angle asymmetries.

60 A second –not mutually exclusive– possibility is that there are additional polar angle  
61 asymmetries in the distribution of other downstream cell types. In the human retina, the best  
62 described retinal ganglion cells (RGCs) are the midget and parasol cells. Both of these cell  
63 types show a decrease in density as a function of eccentricity and vary in density as a function  
64 polar angle in humans [52-58] and monkeys [59-62]. Because midget RGCs are the most  
65 numerous ganglion cells in primates (*i.e.*, 80% of ~1 million RGCs compared to 10% parasols  
66 and 10% other types) and have small cell bodies and small dendritic field trees that increase  
67 with eccentricity [60, 61, 63], they are often hypothesized to set an anatomical limit on high  
68 resolution spatial vision such as acuity and contrast sensitivity at mid to high spatial frequencies  
69 [55, 61].

70 Interestingly, in the range of eccentricities used for many psychophysical tasks (0–10°),  
71 cone density shows an HVA (greater density on the horizontal than vertical meridian), but not a  
72 VMA, inconsistent with behavior (there is a slightly greater density on the upper than lower  
73 vertical visual meridian, opposite what one would predict to explain behavior) [8-10]. Midget  
74 RGC density, in contrast, shows both an HVA and a VMA, making their distribution patterns  
75 more similar to behavioral patterns [52-54, 57, 64].

76 Here, we investigate how asymmetries in the visual system vary across processing  
77 stages. First, we quantify asymmetries in spatial sampling around the visual field in three early  
78 visual processing stages: cones, mRGCs, and V1 cortex. We do so because it is important to  
79 first identify *if* there are any differences in spatial encoding across these processing stages, and  
80 if so, *how* these differences relate to differences in behavior. Then we extend our previously  
81 published computational observer model, which included optics and cone sampling, by adding a  
82 model of conversion from photon absorptions to photocurrent, and then mRGC-like spatial  
83 filtering. We compare this observer model to our previous model (no RGC layer) and to human  
84 performance on a 2-AFC orientation discrimination task. By comparing the predicted  
85 performance to human observers, we can quantify the contribution of mRGCs to visual  
86 performance differences around the visual field.

## 87 Results

88 We quantify the asymmetries in cone density, midget retinal ganglion cells (mRGCs) density  
89 and V1 cortical magnification factor (CMF)—both as a function of eccentricity and for the four  
90 cardinal meridians. In the next two sections, we first show that both eccentricity gradients and  
91 polar angle asymmetries are amplified from cones to mRGCs and from mRGCs to early visual  
92 cortex. Then we implement the observed variations in mRGC density in a computational  
93 observer model to test whether biologically plausible differences in mRGC sampling across the  
94 cardinal meridians can quantitatively explain psychophysical performance differences as a  
95 function of polar angle.

### 96 Fovea-to-periphery gradient is amplified from retina to mRGCs to early 97 visual cortex

98 A hallmark of the human retina is the sharp drop in cone density from fovea to periphery [8-10].  
99 Within the central one degree, cone density decreases dramatically (on average by 3.5-fold).  
100 Beyond the fovea, cone density continues to decrease by 10-fold between 1° and 20°  
101 eccentricity (**Fig 1A**, left panel). This decrease in cone density is due to an increase in cone  
102 spacing caused by the presence of rods and by the increase in cone diameter [9].

103 The second processing stage we focus on are the midget RGCs. The mRGC cell bodies  
104 are laterally displaced from their receptive fields by the foveal cones. Therefore, we use a  
105 computational model by Watson [64] that combines cone density [9], mRGC density [53] and  
106 displacement [57] to infer the mRGC density referred to the visual field, rather than the cell body  
107 positions. Throughout, we refer to mRGC density with respect to receptive fields. Like the  
108 cones, midget RGCs sample the visual field differentially as a function of eccentricity. At the  
109 central one degree, mRGC density is greater than cone density. The fovea-to-periphery gradient  
110 is steeper for mRGCs than for cones (**Fig 1A**, middle panel compared to left panel). This  
111 *divergence* results in a cone:mRGC ratio of 0.5 (**Fig 1B**, left panel), indicating a 'direct line'  
112 between a single cone and a pair of on- and off-center mRGCs. In the periphery, mRGC density  
113 falls off at a faster rate than cones. For example, cone density decreases by 10-fold between 1°  
114 and 20° eccentricity, whereas mRGC density decreases by 80-fold. This *convergence* can also  
115 be expressed in the cone:mRGC ratio, which increases as a function of eccentricity (**Fig 1B**, left  
116 panel).

117

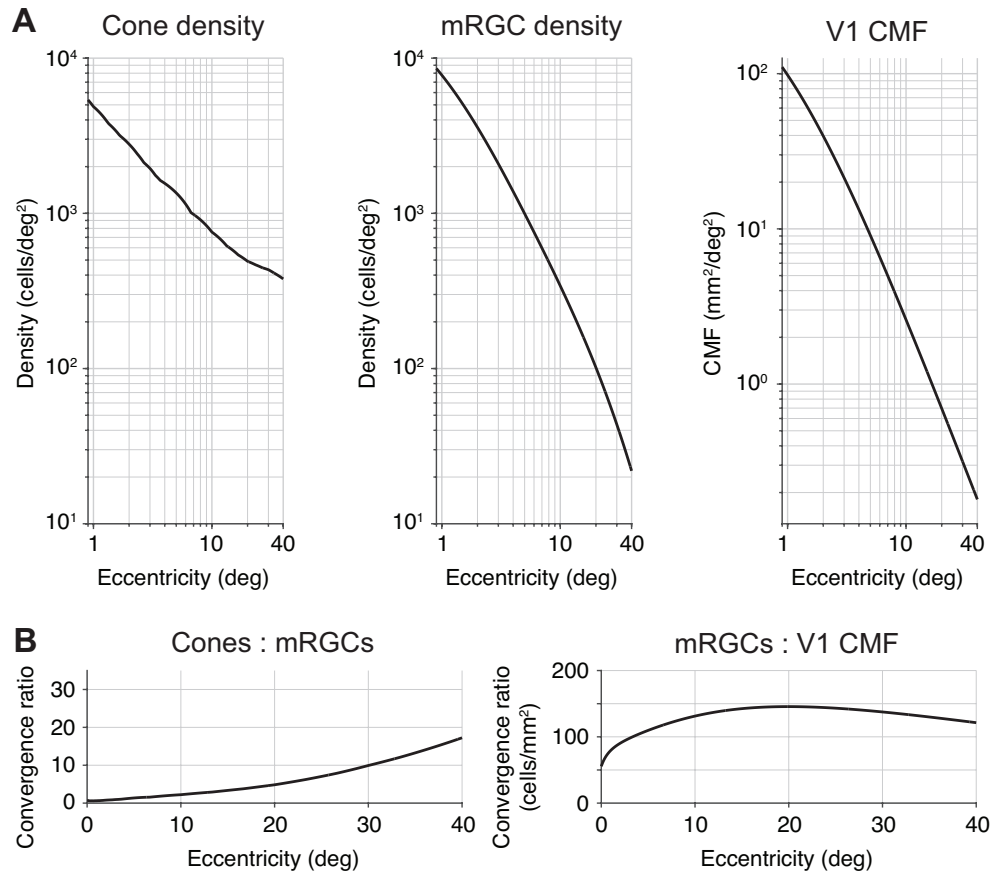

118

119 **Fig 1. Foveal over-representation is amplified from cones to mRGCs to cortex.** (A) Cone density, mRGC  
 120 receptive field density and V1 cortical magnification factor as a function of eccentricity. Left panel: Cone data from  
 121 Curcio *et al.* [9]. Middle panel: midget RGC RF density data from Watson [64]. Both cone and mRGC data are the  
 122 average across cardinal retinal meridians of the left eye using the publicly available toolbox ISETBIO [65-67]. Right  
 123 panel: V1 CMF is predicted by the areal equation published in Horton and Hoyt [68]. (B) Transformation ratios from  
 124 cones to mRGCs and mRGCs to V1. The cone:mRGC ratio is unitless, as both cone density and mRGC density are  
 125 quantified in cells/deg<sup>2</sup>. The increasing ratio indicates higher convergence of cone signals by the mRGCs. For  
 126 mRGC:V1 CMF ratio units are defined in cells/mm<sup>2</sup>. The ratio increase in the first 20 degrees indicates an  
 127 amplification of the foveal over-representation in V1 compared to mRGCs.

128

129 Third, we quantify the amount of V1 surface area devoted to a portion of the visual field,  
 130 also known as the cortical magnification factor (**Fig 1A**, right panel). There have been claims  
 131 that V1 CMF is proportional to retinal ganglion cell density [69-72] and see Discussion).  
 132 However, when comparing human mRGCs density [64] to V1 CMF [68], we find that the ratio is  
 133 not constant: The foveal magnification is even more accentuated in V1 up to 20° eccentricity  
 134 (**Fig 1B**, right panel). These results are consistent with the findings in squirrel monkey [73]; owl  
 135 monkey [74], and macaque [75], all of which show that the cortical magnification function falls  
 136 off with eccentricity more steeply in V1 than would be predicted by mRGC density alone.  
 137 Beyond 20° eccentricity, the mRGC to V1 CMF ratio declines slowly. This effect is driven by V1  
 CMF falling off slightly more steeply than mRGC density. The relative compression of V1 CMF

138 vs mRGC density in the far periphery has been reported in owl monkey [74]. However, given  
139 that this result has not been confirmed in human cortex, we cannot exclude the possibilities that  
140 in the far periphery Watson's formula [64] overpredicts mRGC density, Horton and Hoyt's  
141 formula [68] underpredicts V1 CMF, or a combination of both.

## 142 Polar angle asymmetries are amplified from cones to mRGCs

143 Cone density differs as a function of polar angle. It is higher along the horizontal visual field  
144 meridian (average of nasal and temporal retina meridians) than the upper and lower vertical  
145 visual field meridians (representing the inferior and superior retinal meridians) (**Fig 2A**, left  
146 panel). This horizontal-vertical asymmetry is around 20% and relatively constant with  
147 eccentricity. There is no systematic difference between the cone density in the upper and lower  
148 visual field meridians. If anything, there is a slight 'inverted' vertical-meridian asymmetry in the  
149 central five degrees: cones are more densely packed along the upper vertical visual meridian.  
150 Assuming greater density leads to better performance, this would predict better performance on  
151 the upper vertical meridian in the central three degrees, opposite of the typical asymmetry  
152 reported in behavior, which has been found up to 1.5° eccentricity in a study on contrast  
153 sensitivity [30]. All of these patterns of cone density asymmetries are found using two different  
154 datasets with different methods: a post-mortem retinal dataset [9] and an *in vivo* dataset [10],  
155 indicating reproducibility of the biological finding. All of the patterns are also consistent when  
156 computed using two different analysis toolboxes (ISETBIO [65-67] and *rgcDisplacementMap*  
157 [76], **Supplemental Fig 1**, top row), indicating computational reproducibility.

158 The polar angle asymmetries in density are larger in the mRGC distribution. The  
159 horizontal visual field meridian (average of nasal and temporal retina) contains higher cell  
160 densities (after correction for cell body displacement) than the upper and lower visual field  
161 meridians (**Fig 2A**, middle panel). This horizontal-vertical asymmetry increases with eccentricity.  
162 For example, at 3.5° eccentricity, the average horizontal visual field density is ~20% higher than  
163 the average of upper and lower visual field meridians. By 40° eccentricity, this density difference  
164 increases to ~60%. Beyond 10° eccentricity, this horizontal-vertical asymmetry is mostly driven  
165 by the nasal retina, as it contains higher mRGC density than the temporal retina. This finding is  
166 in line with earlier histology reports in macaque [62] and positively correlated with spatial  
167 resolution tasks (*e.g.*, [77]). This nasal-temporal asymmetry, although interesting, is beyond the  
168 focus of this paper, as the asymmetries in performance we observe are found in both binocular

169 and monocular experiments [12, 16]. Overall, the emphasis on the horizontal is substantially  
 170 greater in the mRGCs than the cones.

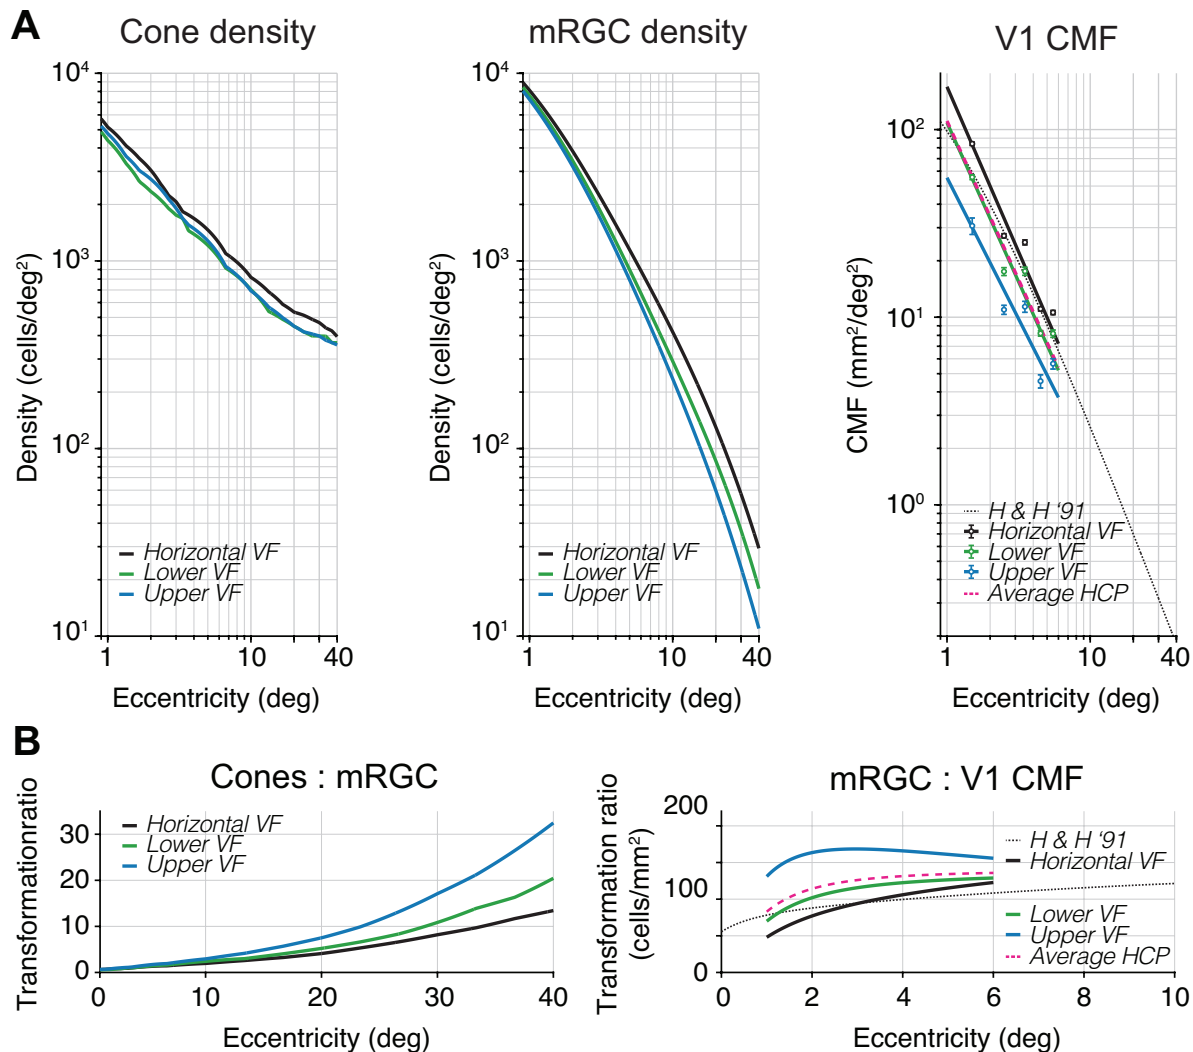

171  
 172 **Fig 2. Nonuniformities in polar angle representations are amplified from cones to mRGCs to cortex.**  
 173 **(A) Cone density, mRGC density, and V1 CMF for cardinal meridians as a function of eccentricity.** Left panel:  
 174 Cone density from Curcio *et al.* [9]. Middle panel: mRGC densities from Watson [64]. All data are in visual field  
 175 coordinates. Black line represents the horizontal visual field meridian (average of nasal and temporal retina), green  
 176 line represents lower visual field meridian (superior retina), and blue line represents upper visual field meridian  
 177 (inferior retina). Cone and mRGC data are computed with the open-source software ISETBIO [65-67]. Right panel: V1  
 178 CMF computed from the HCP 7T retinotopy dataset analyzed by Benson *et al.* [78] (black, green, blue dots and lines)  
 179 and predicted areal CMF by the formula in Horton and Hoyt [68] (dotted black line, replotted from Fig 1). All data are  
 180 plotted in visual field coordinates where black, green, and blue data points represent the horizontal, lower, and upper  
 181 visual field meridians, respectively. Data points represent the median V1 CMF of  $\pm 20^\circ$  wedge ROIs along the  
 182 meridians for 1–6° eccentricity in 1° bins. Error bars represent 68%-confidence intervals across 163 subjects using  
 183 1,000 bootstraps. Black, green, and blue lines are 1/eccentricity power functions fitted to corresponding data points.  
 184 Pink dashed line is the average of fits to horizontal, upper, and lower visual field meridians from HCP 7T retinotopy  
 185 dataset [78] and agrees well with Horton and Hoyt's formula [68]. **(B) Transformation ratios from cones to mRGCs**  
 186 **and mRGCs to V1 CMF.** Ratios are shown separately for the horizontal (black), lower (green) and upper (blue)  
 187 visual field meridians. The mRGC:V1 CMF panel has a truncated x-axis due to the limited field-of-view during cortical  
 188 measurements. These polar angle asymmetries can be found across two different computational models of mRGC  
 189 density (see **Supplemental Fig 1**, second row).



190 Unlike the cones, mRGC receptive fields show a consistent asymmetry along the vertical  
191 meridian: The lower visual meridian (superior retinal meridian) contains a higher mRGC density  
192 than the upper visual meridian (inferior retinal meridian). This is consistent with the  
193 psychophysical VMA, showing better performance on the lower vertical meridian [12-15, 19-31].  
194 This asymmetry increases with eccentricity. For example, the lower vertical meridian (superior  
195 retina) has ~15% higher density compared to upper vertical (inferior) at 3.5°, and ~50% higher  
196 density at 40° eccentricity. This interaction between retinal meridian and eccentricity is  
197 summarized in the cone-to-mRGC transformation plot (**Fig 2B**, left panel), where the  
198 convergence ratio from cones to mRGCs increases more rapidly along the upper than the lower  
199 vertical and the horizontal visual meridians (see also **Supplemental Fig 2**).

## 200 Polar angle asymmetries are amplified from mRGCs to early visual cortex

201 Because the areal V1 CMF calculation by Horton and Hoyt [68] does not make separate  
202 predictions for the cardinal meridians, we used the publicly available retinotopy dataset from the  
203 Human Connectome Project (HCP) analyzed by Benson *et al.* [79] to calculate the CMF along  
204 the meridians (see also [78]). As a first check on agreement between the two datasets, we  
205 found that the V1 CMF data measured in 163 subjects with functional MRI [78], pooled across  
206 all polar angles, was a close match to Horton and Hoyt's [68] prediction based on lesion case  
207 studies from three decades ago. We then used the HCP dataset to compute CMF along the  
208 separate meridians.

209 We find that polar angle asymmetries in cortical magnification factors are yet larger than  
210 those found in mRGC density (**Fig 2A**, right panel), where V1 CMF is higher on the horizontal  
211 than vertical meridian, and the V1 CMF is higher for the lower than the upper vertical meridian.  
212 For example, at 3.5° eccentricity CMF is ~52% higher on the horizontal than vertical meridians  
213 and ~41% higher for the lower than upper vertical meridian. These polar angle asymmetries  
214 show a 2x increase within the first three degrees of eccentricity before flattening (**Fig 2B**, right  
215 panel) and are mostly driven by the upper vertical meridian (**Supplemental Fig 2**). This  
216 indicates that the mapping of the visual field in early visual cortex is not simply predicted from  
217 the distribution of midget retinal ganglion cells, but rather the cortex increases the retinal polar  
218 angle asymmetries.

## 219 A computational observer model from stimulus to mRGCs to behavior

220 To understand how polar angle asymmetries in visual field representations might affect visual  
221 performance, we added a photocurrent transduction and retinal ganglion cell layer to our  
222 computational observer model [50]. In this observer model, we used the publicly available  
223 ISETBIO toolbox [65-67] to simulate the first stages of visual pathway including the stimulus  
224 scene, fixational eye movements, chromatic and achromatic optical aberrations, and  
225 isomerization by the cone array. Combining model output with a linear support vector machine  
226 classifier allowed us to simulate performance on a 2-AFC orientation discrimination task given  
227 information available in the cones. When matching stimulus parameters in the model to a  
228 previously published psychophysical experiment [13], we showed that biologically plausible  
229 variations in optical quality and cone density together would contribute no more than ~10% to  
230 the observed polar angle asymmetries in contrast sensitivity.

231         Given the inability of cone density to quantitatively explain differences in visual  
232 performance, we extended our model further into the retina to include temporal and spatial  
233 filtering, and noise at two later processing stages. First, we added temporal filtering and noise in  
234 the conversion of cone isomerizations to photocurrent in the cone outer segments. Second, we  
235 added spatial filtering and noise in a model of midget RGCs. The mRGCs are especially  
236 interesting because they show a systematic asymmetry between the upper and lower visual  
237 field (where the cones did not), and an amplification of the horizontal-vertical asymmetry. The  
238 mRGC computational stage is implemented after cone isomerizations and photocurrent and  
239 before the model performs the discrimination task. We provide a short overview of the modeled  
240 stages that precede the mRGC layer, as details of these stages can be found in our previous  
241 paper [50], followed by a discussion of the implementation details of the photocurrent  
242 transduction and mRGC layer.

### 243 Scene radiance

244 The first stage of the model comprises the photons emitted by a visual display. This results in a  
245 time-varying scene defined by the spectral radiance of an achromatic low contrast Gabor  
246 stimulus (**Fig 3**, panel 1). The Gabor was oriented 15° clockwise or counter-clockwise from  
247 vertical with a spatial frequency of 4 cycles per degree. These stimulus parameters were  
248 chosen to match a recent psychophysical experiment [15] to later compare model and human  
249 performance.

## 250 Retinal irradiance

251 The second stage simulates the effect of emitted photons passing through the human cornea,  
252 pupil, and lens. This computational step results in time-varying retinal irradiance (**Fig 3**, panel  
253 2). Optics are modeled as a typical human wavefront with a 3-mm diameter pupil without  
254 defocus, and contain a spectral filter that reduces the fraction of short wavelengths (due to  
255 selective absorption by the lens). We do not vary the optics across the different simulations.

## 256 Cone absorptions

257 The third stage implements a rectangular cone mosaic with L-cones only ( $2 \times 2^\circ$  field-of-view).  
258 For each cone, we compute the number of photons absorbed in each 2-ms bin, resulting in a 2D  
259 time-varying cone absorption image (**Fig 3**, panel 3). The number of absorptions depends on  
260 the photoreceptor efficiency and on the wavelengths of light and on Poisson sampling due to the  
261 quantal nature of light. This stage differs in two ways from our previous model. First, we use an  
262 L-cone-only retina, and second, we exclude fixational eye movements. We make these two  
263 simplifications to keep the model tractable and the calculations to reasonable size. As we  
264 describe in the Methods, the number of trials is much larger than in our previous work (to ensure  
265 that the classifier has sufficient information to learn the best classification), the number of  
266 conditions simulated is much larger (because we vary both cone density and mRGC:cone  
267 ratios), and the noise level is substantially higher (because we add noise at phototransduction  
268 and mRGC stages). The lack of eye movements enables us to average time points across trials,  
269 greatly speeding up processing, as well as simplifying the interpretation of how the new stages  
270 contributed to performance.

## 271 Cone photocurrent

272 The fourth stage converts photon absorptions to photocurrent, incorporating the recently added  
273 phototransduction functionality in ISETBIO by Cottaris *et al.* [51]. Here, phototransduction is  
274 implemented as a temporal filter followed by gain control and additive noise (**Fig 3**, panel 4).  
275 The result is a continuous time-varying signal in units of current (picoamps). While we use the  
276 same photocurrent model for all cones irrespective of size or location, the effect of the  
277 photocurrent depends on properties of the cones, due to the additive noise. Specifically, the  
278 signal-to-noise decreases more for larger cones than smaller cones, because large cones  
279 capture more photons and are subject to more downregulation before the additive noise.

280 **Fig 3. Overview of computational observer**  
 281 **model with additional mRGC layer.** A 1-ms  
 282 frame of a 100% contrast Gabor stimulus is  
 283 used at each computational step for illustration  
 284 purposes. **(1) Scene radiance.** Photons  
 285 emitted by the visual display, resulting in a  
 286 time-varying scene spectral radiance. Gabor  
 287 stimulus shows radiance summed across 400-  
 288 700 nm wavelengths. **(2) Retinal irradiance.**  
 289 Emitted photons pass through simulated  
 290 human cornea, pupil, and optics, indicated by  
 291 the schematic point spread function (PSF) in  
 292 the top right-side box, resulting in time-varying  
 293 retinal irradiance. Gabor stimulus shows  
 294 irradiance with wavelengths converted to RGB  
 295 values for illustration purposes. **(3) Cone**  
 296 **absorptions.** Retinal irradiance is isomerized  
 297 by a rectangular cone mosaic, resulting in time-  
 298 varying photon absorption rates for each L-  
 299 cone with Poisson noise. **(4) Cone**  
 300 **photocurrent.** Absorptions are converted to  
 301 photocurrent via temporal integration, gain  
 302 control, followed by adding Gaussian white  
 303 noise. This results in time-varying photocurrent  
 304 for each cone. **(5) Midget RGC responses.**  
 305 Time-varying cone photocurrents are convolved  
 306 with a 2D Difference of Gaussians spatial filter  
 307 (DoG), followed by additive Gaussian white  
 308 noise and subsampling (see also Fig 4). **(6)**  
 309 **Behavioral inference.** A linear support vector  
 310 machine (SVM) classifier is trained on the RGC  
 311 outputs to classify stimulus orientation per  
 312 contrast level. With 10-fold cross-validation,  
 313 left-out data are tested, and accuracy is fitted  
 314 with a Weibull function to extract the contrast  
 315 threshold at ~80%.

316

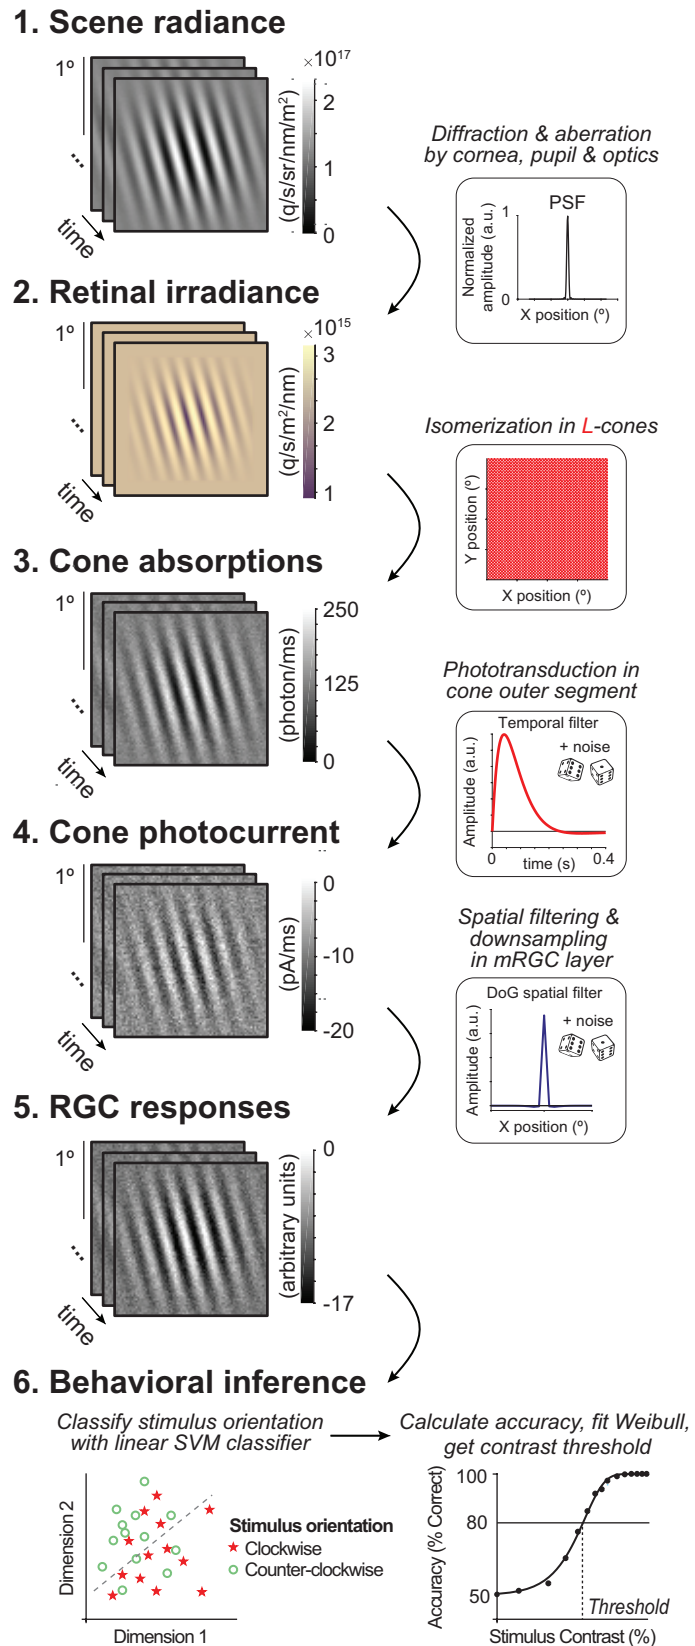

## 317 Midget RGC responses

318 The fifth stage is spatial filtering by the mRGCs. We model the mRGCs in a rectangular array  
319 with each mRGC receptive field centered on a cone. We do not add further temporal filtering  
320 beyond that inherited from the photocurrent stage. We do not explicitly model spiking and its  
321 associated noise, but instead add independent Gaussian white noise to each RGC output at  
322 each time point. Unlike the photocurrent, where the noise is implemented in ISETBIO according  
323 to a physiologically informed model [80], the noise added in the mRGC layer is not constrained  
324 by a physiological model because the noise added by mRGCs (after accounting for noise  
325 inherited from prior stages) is less well known. For this reason, in additional simulations, we  
326 explore the effect of noise level in RGCs, and find that while the mean performance declines  
327 with increasing noise (as expected), the differences between conditions are largely unaffected  
328 by noise level (**Supplemental Fig 4**). In the Discussion, we elaborate on the possible  
329 contribution of other aspects of retinal processing to polar angle asymmetries such as spatial  
330 subunits and spiking.

331 The mRGC layer has the same field-of-view as the cone array. Because we do not  
332 model rectification or spiking non-linearities, we do not separately model on- and off-cells. Our  
333 mRGC receptive fields are 2D difference of Gaussian (DoG) models, approximating the shape  
334 of receptive fields measured with electrophysiology [81, 82] (**Fig 3**, panel 5), based on  
335 parameters from macaque [83]. The width of the center Gaussian ( $\sigma_c$ , 1 sd) is  $\frac{1}{3}$  of the spacing  
336 between neighboring cones, and the surround Gaussian ( $\sigma_s$ ) is 6x the width of the center. This  
337 creates an mRGC array with one mRGC per cone and where mRGC RFs overlap at 1.3  
338 standard deviations from their centers, which matches the overlap of dendritic fields reported in  
339 human retina [55]. We compute the mRGC responses by convolving the cone absorptions with  
340 this mRGC DoG receptive field. Because the ratio of mRGCs to cones varies across the retina,  
341 we simulate differences in this ratio by subsampling the mRGC array (**Fig 4**). Thus, the mRGC  
342 density (cells/deg<sup>2</sup>) is determined by both the cone array density and the cone-to-mRGC ratio,  
343 creating a 2D space of simulations.

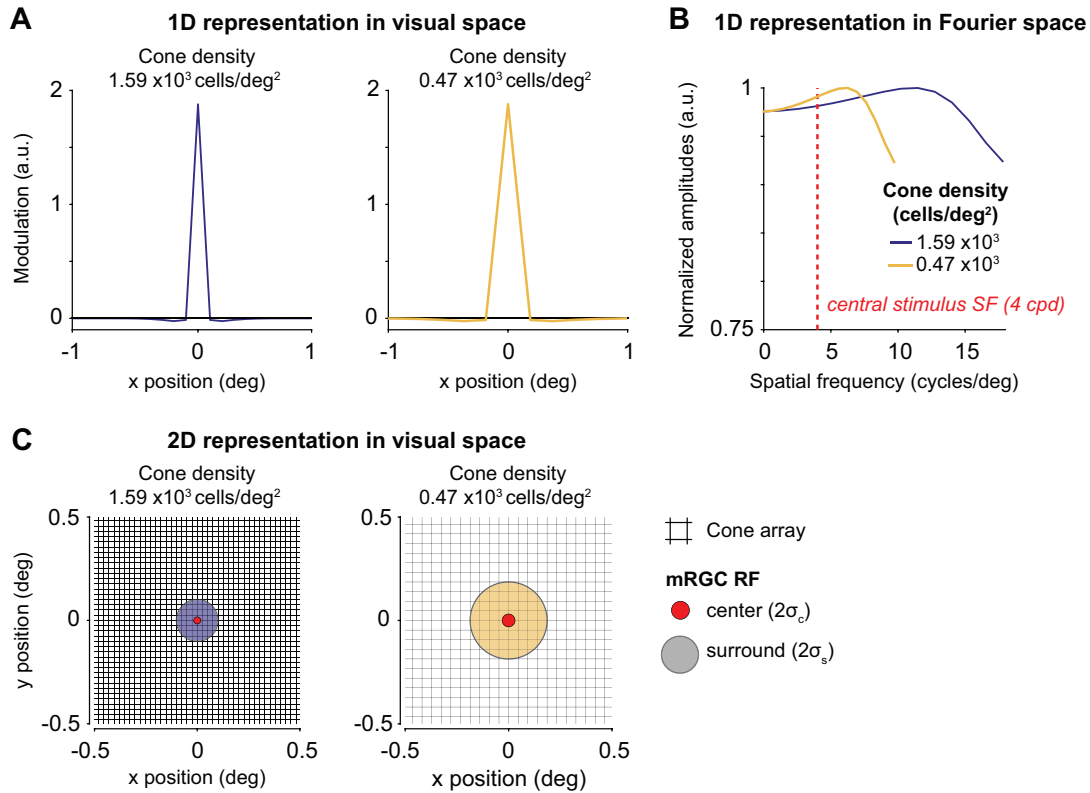

344  
 345 **Fig 4. Difference of Gaussians filters used to model mRGC layer.** Two mRGCs are illustrated for a  $2 \times 2^\circ$  field-of-  
 346 view mRGC array centered at  $4.5^\circ$  and  $40^\circ$  eccentricity. **(A) 1D representation of two example mRGC layers in**  
 347 **visual space.** The mRGC responses are computed by convolving the cone image with the mRGC DoG RF, followed  
 348 by adding noise (not shown), and subsampling the cone array to the corresponding mRGC density. Width for  
 349 Gaussian center ( $\sigma_c$ ) and surround ( $\sigma_s$ ) are converted to units of degree. As the mRGC filters in our model are not  
 350 rectified, they respond to both increments and decrements. Physiologically, this would require two cells (an ON and  
 351 OFF cell), so we count each modeled mRGC location as two cells. Both panels show a mRGC:cone ratio of 2:1. **(B)**  
 352 **1D representation of Difference of Gaussians in Fourier space.** The Fourier representation illustrates the band-  
 353 pass and unbalanced nature of the DoGs (*i.e.*, non-zero amplitude at DC). Depending on the width/subsample rate,  
 354 DoGs attenuate different spatial frequencies. However, at our peak stimulus frequency (4 cycles per degree,  
 355 indicated with red dashed line) the two DoGs filters vary a relatively small amount, preserving most stimulus  
 356 information. Fourier amplitudes are normalized. Note that y-axis is truncated for illustration purposes. **(C) 2D**  
 357 **representation of two example mRGC layers shown in panel (A).** Midget RGC DoG filters are zoomed into a  $1 \times 1^\circ$   
 358 field-of-view cone array (black raster) centered at  $4.5^\circ$  (red center with purple surround) and  $40^\circ$  eccentricity (red  
 359 center with yellow surround), corresponding to the 1D examples in panel A. Centers and surrounds are plotted at 2  
 360 standard deviations. For illustration purposes, only one mRGC is shown; the mRGC array in our computational  
 361 observer model tiles the entire cone array.

## 362 Behavioral inference

363 The final stage of the computational observer model is the decision maker. For the main  
 364 analysis, we use a linear support vector machine (SVM) classifier to discriminate stimulus  
 365 orientation (clockwise or counter-clockwise from vertical) given the cone absorptions, cone  
 366 photocurrent, or mRGC responses. We compute a weighted average across time for the output  
 367 of each cell before running the classifier. This greatly reduces the dimensionality of the classifier  
 368 input, and therefore speeds up computation time and reduces the number of trials needed for

369 the classifier to learn optimal classification boundary. The weighting is proportional to the  
370 temporal filter in the photocurrent simulation, such that the time points with the highest weight in  
371 the filter has the largest contribution to the weighted average. Because we do not simulate eye  
372 movements or vary the phase of the stimulus, the only changes over time arise from the noise  
373 and temporal filtering by the photocurrent, and hence there is little to no loss of signal from  
374 averaging. The classifier trains and tests on the averaged responses for each stimulus contrast  
375 separately, where each contrast level results in a percent correct identified stimulus. The  
376 accuracy results are then fitted with a Weibull function to extract the contrast threshold at ~80%.

### 377 The cone photocurrent and mRGCs have a large effect on orientation 378 discrimination

379 We find large effects on performance of the computational observer when adding the cone  
380 photocurrent and the mRGC layers. For comparison, we ran the SVM decision maker either on  
381 the cone absorptions, the cone photocurrent, or the mRGC outputs while varying the cone  
382 density and the stimulus contrast. Consistent with our prior model [50], thresholds are low (~0.1-  
383 0.2%) when analyzed on the cone absorptions, and show only a small effect of cone density  
384 (**Fig 5A**). Thresholds increase sharply, about 5-10x, after the absorptions are converted to  
385 photocurrent (**Fig 5B**). This increase is due to noise in the photocurrent, consistent with prior  
386 results [51]. Surprisingly, the effect of cone density is also substantially increased, as seen in  
387 the greater spread of the psychometric functions. This is because the cones in the lower density  
388 retinal patches have larger apertures, resulting in greater photon capture, and hence more  
389 downregulation when converted to photocurrent. Over the 10-fold range of retinal densities,  
390 threshold vary by only about 1.4:1 for the absorptions, much less in contrast to about 5:1 for the  
391 photocurrent. The spatial filtering and late noise from the mRGCs further elevate thresholds, but  
392 at a fixed mRGC:cone ratio there is little change in the effect of cone density: the threshold vs  
393 density plot shows a vertical shift compared to the cone photocurrent, with about the same  
394 slope (**Fig 5c**).

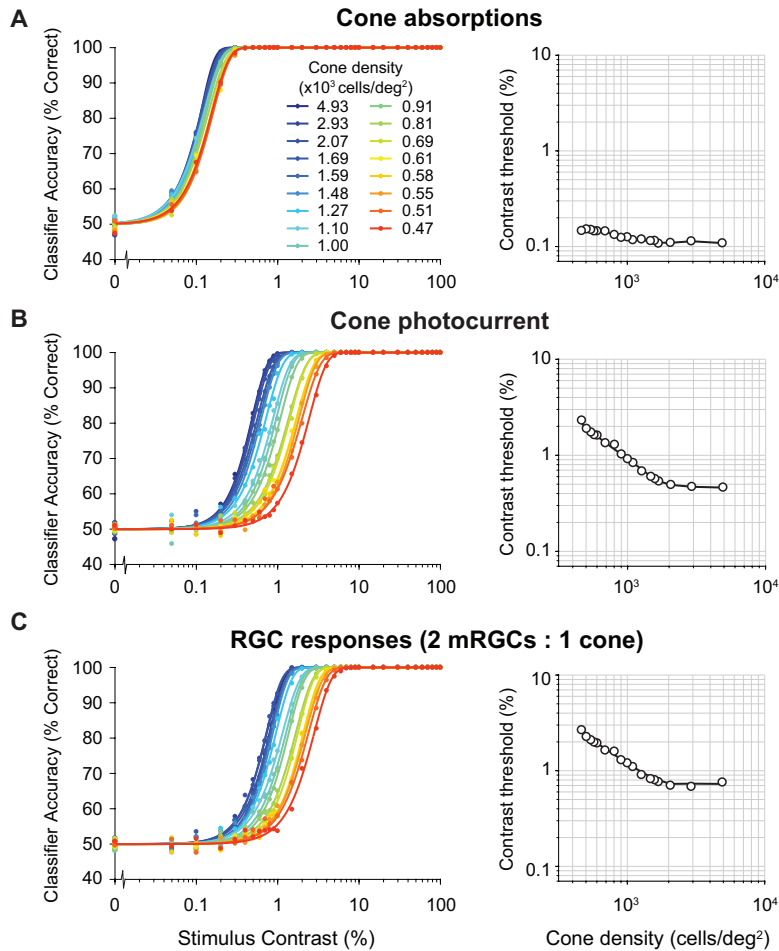

395

396 **Fig 5. Model performance for different computational stages.** Left column shows classifier accuracy as function of stimulus contrast. Data are from simulated experiments with 1,000 trials per stimulus class, using a model with a L-  
 397 cone only mosaic varying in cone density. Data are fitted with a Weibull function. Contrast thresholds are plotted  
 398 separately as a function of cone density in the right column. **(A) Cone absorptions.** Applying a linear SVM classifier  
 399 to cone absorptions averaged across stimulus time points. **(B) Cone photocurrent.** Applying a linear SVM classifier  
 400 to cone outer segment photocurrent responses, averaged across time weighted by a temporally delayed stimulus  
 401 time course. This transformation of cone absorptions into photocurrent causes a ~10x increase in contrast thresholds,  
 402 interacting with cone density (*i.e.*, Weibull functions are spaced out compared to cone absorptions). **(C) RGC**  
 403 **responses.** Applying a linear SVM classifier to spatially filtered photocurrent with added white noise. This  
 404 transformation causes an additional increase in contrast thresholds for all cone densities. Data show results for a  
 405 fixed subsampling ratio of 2 mRGCs per cone.  
 406

407

408

409

410

411

412

413

414

We next quantified the effect of the mRGC:cone ratio on computational observer performance. We find that as the ratio increases, contrast thresholds decline (**Fig 6A**). The effect of the mRGC:cone ratio is largely independent of the cone density. For example, at any cone density, downsampling the mRGC density by 4x elevates thresholds by about 70% to 80%. The better model performance with more mRGCs comes from higher SNR, which arises because the signal is correlated across mRGCs (due to spatial pooling), whereas the noise added in the mRGC layer is independent. To visualize the space of predicted contrast thresholds as a function of cone density and mRGC:cone ratio, we plot model thresholds as a



415 function of both independent variables (**Fig 6B**). This surface plot confirms the observation from  
 416 the line plots (**Fig 6A**) that the effects of these two retinal factors—cone density and  
 417 mRGC:cone ratio—have approximately independent, additive effects on model contrast  
 418 threshold.

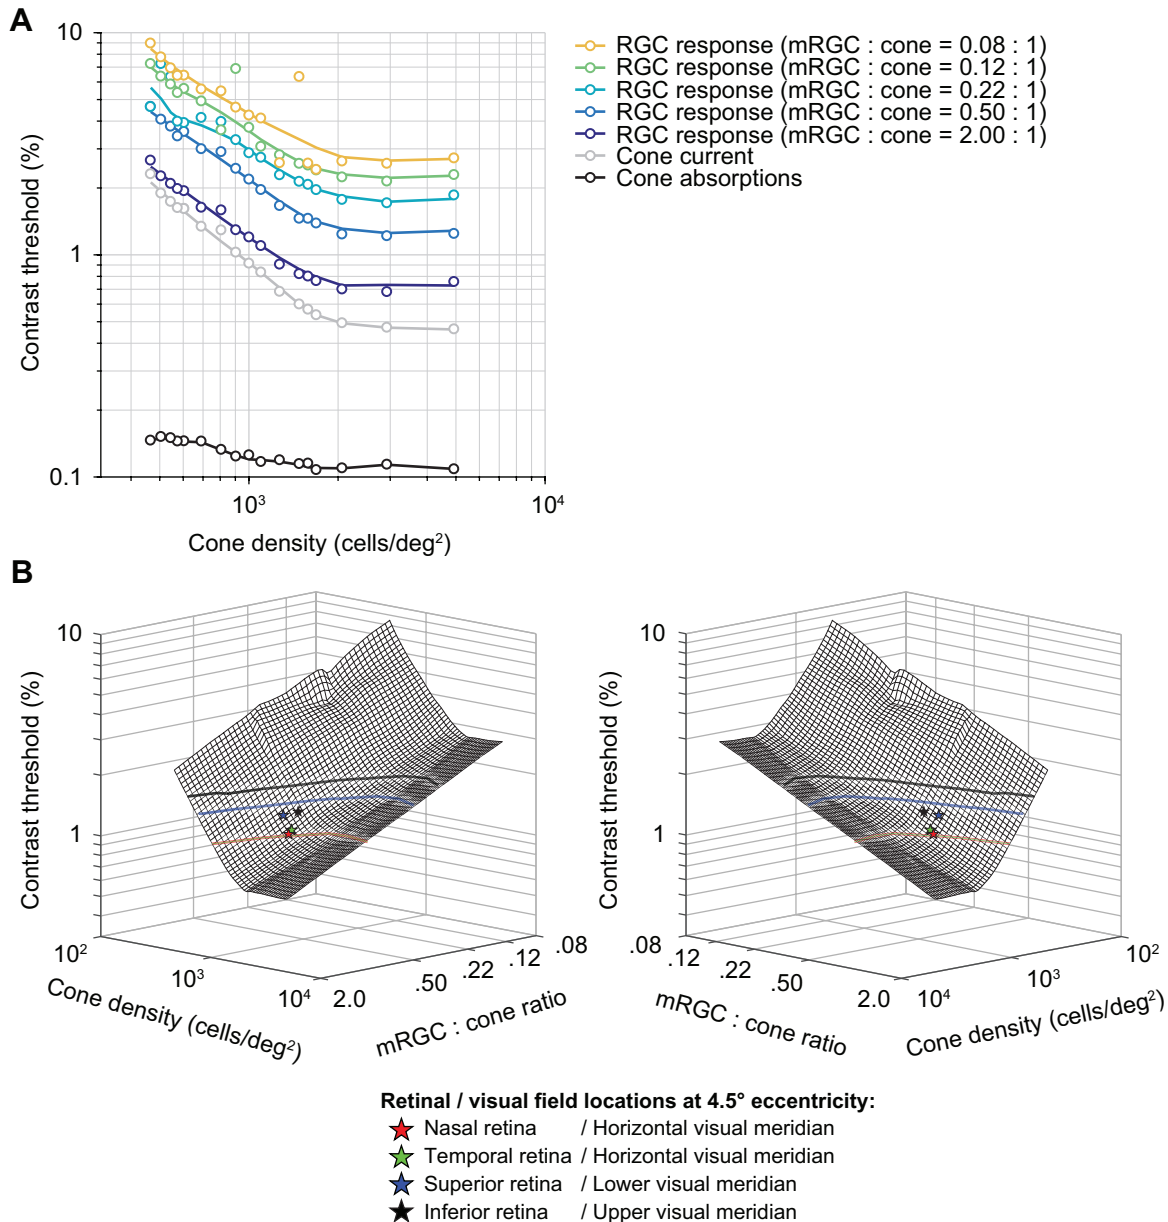

419  
 420 **Fig 6. The effect of spatial filtering properties by mRGCs on full model performance. (A) Contrast thresholds**  
 421 **as a function of cone density and mRGC:cone ratio.** Data points are contrast thresholds for cone absorptions,  
 422 cone photocurrent, and each mRGC:cone ratio separately (for psychometric functions see **Supplemental Fig 3**).  
 423 Individual mRGC fits are slices of the 3D mesh fit shown in panel B. **(B) Mirrored views of combined effect of cone**  
 424 **density and mRGC:cone ratio on contrast sensitivity.** The mesh is fitted with a locally weighted regression to 3D  
 425 data: log cone density (x-axis) by log mRGC:cone ratio (y-axis) by log contrast thresholds (z-axis). Individual dots  
 426 represent the predicted model performance for nasal retina or horizontal visual (red star), superior retina or lower

427 visual (blue star), temporal retina or horizontal visual (green star) and inferior or upper visual (black star) meridian  
428 locations at 4.5° eccentricity (matched to stimulus eccentricity in [15]). Contour lines show possible cone densities  
429 and mRGC:cone ratios that would predict the same horizontal-vertical and upper/lower vertical-meridian asymmetry  
430 as observed in psychophysical data at 4.5° eccentricity. To do so, we scaled the difference in contrast threshold  
431 between the lower (blue) and upper (black) vertical visual meridian relative to the horizontal meridian to match the  
432 difference in behavior. Goodness of fit of 3D mesh fit is  $R^2 = 0.96$ .

### 433 Comparison between model and human contrast sensitivity

434 To compare model performance to human observers, we evaluate the model outputs for cone  
435 densities and mRGC:cone ratios that match the values on the different meridians according to  
436 the literature. We then compare these predicted thresholds to those obtained in a recent  
437 psychophysical experiment [15]. We also compare both the human data and the mRGC model  
438 data to two simplified models, one which omits the mRGCs and one which omits mRGCs and  
439 the conversion from isomerizations to photocurrent.

440 According to Curcio *et al.* [9], cone density at 4.5° eccentricity is ~1,575 cones/deg<sup>2</sup> on  
441 the horizontal retinal meridian (nasal: 1590 cones/deg<sup>2</sup>, temporal: 1560 cones/deg<sup>2</sup>), 1300  
442 cones/deg<sup>2</sup> on the superior retinal meridian, and 1382 cones/deg<sup>2</sup> on the inferior retinal  
443 meridian. We combine these cone density values with the mRGC:cone ratios from the  
444 computational model by Watson [64], which ranges between 0.84 mRGCs per cone on the  
445 horizontal meridian (nasal: 0.87, temporal: 0.82), to 0.81 on the superior retina and 0.68 on the  
446 inferior retina.

447 Consistent with our previous report [50], we find that a model in which the pattern of  
448 photon absorptions is fed into the linear SVM classifier shows only a small effect of cone density  
449 (**Fig 7A**, left). Given the expected cone densities at the different polar angles at 4.5°  
450 eccentricity, the model predicts only about 5% higher sensitivity for the horizontal than vertical  
451 visual meridians, much less than the 40% difference found in behavioral experiments [15] (**Fig**  
452 **7B**). The model also predicts almost no difference between upper and lower vertical visual  
453 meridian, whereas human sensitivity was found to be about 20% higher on the lower than upper  
454 vertical visual meridian. The overall sensitivity of the model observer (800-900) is considerably  
455 higher than human sensitivity (~30-50).

456 The conversion from cone absorptions to cone photocurrent reduces the sensitivity by  
457 about 4- to 5-fold, and increases the asymmetries. The linear SVM classifier performance based  
458 on the cone photocurrent shows about 15% higher sensitivity for horizontal than vertical visual  
459 meridian, an asymmetry that is 3 times larger than that found in a model up to cone  
460 isomerizations. It also predicts about 9% higher sensitivity for upper vertical than lower vertical

461 visual meridian (opposite to the pattern in human data). This is because the cone density is  
 462 slightly higher for the upper than lower vertical visual meridian at this eccentricity (4.5 degrees).

463 Finally, the mRGC model brings overall performance closer to behavior, with sensitivity  
 464 of about 70-90, and ~18% higher sensitivity for the horizontal than vertical visual meridian,  
 465 predicting almost half the asymmetry found in behavior (~40%). The mRGC model also  
 466 eliminates the advantage for upper over lower vertical visual meridian (now predicting slightly  
 467 higher performance for the lower vs upper vertical), which is the same direction as the pattern  
 468 observed in the human data.

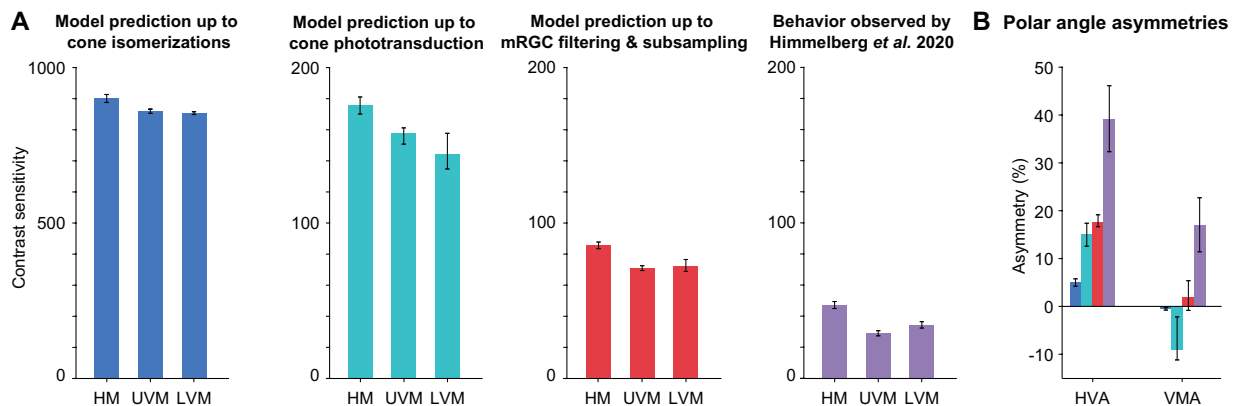

469  
 470 **Fig 7. Comparison of model performance to human performance. (A) Contrast sensitivity predicted by**  
 471 **computational observer model up to isomerizations in cones (blue), up to cone outer segment**  
 472 **phototransduction (turquoise), up to spatial filtering and subsampling in mRGCs (red), and behavior**  
 473 **observed (purple) by Himmelberg et al. (2020) using matching stimulus parameters.** HM: horizontal meridian,  
 474 UVM: upper visual meridian, LVM: lower visual meridian. Model prediction shows contrast sensitivity (reciprocal of  
 475 contrast threshold) for stimuli at 4.5° eccentricity, with a spatial frequency of 4 cycles per degree. HM is the average  
 476 of nasal and temporal meridians. Model error bars indicate simulation results allowing for uncertainty in the cone or  
 477 mRGC density along each meridian (see Methods for details). Behavioral results show group average results ( $n=9$ )  
 478 from Himmelberg et al. [15], and error bars represent standard error of the mean across observers. **(B) Polar angle**  
 479 **asymmetries for cone absorptions, photocurrent, mRGCs, and behavior.** HVA: horizontal-vertical asymmetry.  
 480 VMA: vertical-meridian asymmetry. Blue, turquoise, red, and purple bars match panel (A) and correspond to model  
 481 prediction up to cone absorptions, cone photocurrent, mRGCs, human behavior. Error bars represent the HVA and  
 482 VMA when using the upper/lower bound of predicted model error from panel A.

483 Overall, our models show that although including an mRGC layer predicts polar angle  
 484 asymmetries closer to behavior than a model up to cone absorptions or up to photocurrent, the  
 485 biological variations in the spatial properties of mRGCs are not sufficient to fully explain  
 486 differences in behavior. For example, the measured cone densities for the upper and lower  
 487 vertical visual meridians are about 12% and 19% lower than for the horizontal. To predict the  
 488 horizontal-vertical and vertical-meridian asymmetries as observed in human performance, and  
 489 without further changing the mRGC:cone ratios, the cell densities would instead have to be  
 490 ~37% and 30% lower than the horizontal. Alternatively, one could keep the cone densities fixed  
 491 at the levels estimated by Curcio et al. [9], and instead vary the mRGC:cone ratio as observed

492 by Watson [64]. In this case, the ratios would have to decrease from 0.81 to 0.52 for the lower  
493 vertical and 0.68 to 0.32 for the upper vertical visual meridian. If one decreased both the cone  
494 densities and the mRGC:cone ratios by tracing out the values along the nasal retinal meridian,  
495 one would need to increase eccentricity of a stimulus from 4.5° to 7.3° (upper vertical) or 6.3°  
496 (lower vertical) to match the behavioral asymmetries.

## 497 Discussion

498 The visual system, from retina to subcortex to cortex, is organized in orderly maps of the visual  
499 field. But within each particular processing stage, the retinotopic map is distorted. Here we  
500 investigated the polar angle asymmetries in these spatial representations across three stages of  
501 the early visual pathway: cones, mRGCs and V1 cortex. Our study revealed that both the  
502 eccentricity gradient (foveal bias) and polar angle asymmetries (HVA and VMA) in spatial  
503 representations are amplified from cones to mRGCs, and further amplified from mRGCs to early  
504 visual cortex. Additionally, we showed that although mRGC density has considerably polar  
505 angle asymmetries in the directions predicted by psychophysical studies, they are insufficient to  
506 explain observed differences in human's contrast sensitivity around the visual field.

### 507 Linking behavior to eccentricity and polar angle asymmetries in visual field 508 representations

509 For over a century, limits in retinal sampling were hypothesized to cause the fovea-to-periphery  
510 gradient in human visual performance [1, 5, 6]. Initial tests of this idea showed that the fall-off in  
511 cone density could explain some, but not all of the observed decrease in visual acuity [2, 3, 84-  
512 87]. Later, more detailed computational models, reported that mRGCs come closer in predicting  
513 the eccentricity-dependent decrease in achromatic contrast sensitivity and resolution, and  
514 conclude that mRGCs are sufficient to explain some aspects of behavior, such as spatial  
515 resolution and contrast sensitivity [88-94]. Similar to the retina, the cortical magnification factor  
516 in V1 has been linked to visual performance as a function of eccentricity, for example,  
517 explaining differences in acuity [92, 95, 96], contrast sensitivity and resolution [20], visual search  
518 [97, 98], and the strength of some visual illusions [99].

519 Conversely, polar angle asymmetries have rarely been considered. For instance, all  
520 above-mentioned studies either ignored the stimulus polar angle for analysis or limited  
521 measurements to a single meridian, usually the horizontal. Despite the fact that the existence of

522 polar angle asymmetries in human early visual cortex was predicted based on behavior in the  
523 late 70's [19, 20], further reports on polar angle differences have been scarce. One fMRI study  
524 reported a higher V1 BOLD amplitude for stimuli on the lower than the upper visual meridian  
525 [100] and two studies found more cortical surface area devoted to the horizontal than the  
526 vertical meridian [101, 102]. Our recent studies suggest that V1 surface area is highly correlated  
527 to spatial frequency thresholds [78] and contrast sensitivity [103]. Yet several studies have  
528 assumed little to no polar angle differences in macaque V1 CMF [104, 105] or did not account  
529 for polar angle differences in human V1 CMF [46, 96] to explain differences in behavior.  
530 Computational models that include retinal and/or V1 sampling across visual space generally  
531 exclude polar angle asymmetries (*e.g.*, [106, 107]). A few cases do incorporate polar angle  
532 asymmetries in the retinal ganglion cell distribution, but they assume that these asymmetries  
533 are not amplified in cortex [108-110].

#### 534 Early visual cortex does not sample the retina uniformly

535 It is well documented that the convergence of cones to retinal ganglion cells varies with  
536 eccentricity (*e.g.*, see [91]). In the fovea of both primates and humans, there is one cone per  
537 pair of bipolar cells and pair of midget RGCs, with pairs comprised of an "on" and an "off" cell. In  
538 contrast, in the periphery, there are many cones per pair of bipolar cells and midget RGCs, with  
539 the ratio depending on the eccentricity. In the far periphery, there can be dozens of cones per  
540 ganglion cell [9].

541 It has been long debated whether V1 further distorts the visual field representation, or if  
542 V1 samples uniformly from RGCs, as reviewed previously [71, 72]. Our analysis showed more  
543 cortical surface area devoted to the fovea than the parafovea and to the horizontal than vertical  
544 meridian, supporting previous findings using retinotopy informed by anatomy [101] and  
545 functional MRI [78, 102, 103, 111]. Importantly, these eccentricity and polar angle non-  
546 uniformities are larger in V1 than they are in mRGC density, in agreement with findings from  
547 monkey [61, 73-75, 112, 113]. Whether these non-uniformities arise in cortex, or depend on the  
548 mapping from retina to LGN, LGN to V1, or both, is a question of interest in both human [114,  
549 115] and monkey [116-120], but beyond the scope of this paper. The implication of the  
550 increased spatial non-uniformities in the cortical representation is that cortex cannot be  
551 understood as a canonical wiring circuit from the retina repeated across locations.

552 Because visual field distortions are larger as a function of eccentricity than polar angle,  
553 one might surmise that polar angle asymmetries contribute little to visual performance. Even

554 though the polar angle asymmetries are smaller than the eccentricity effects, they can in fact be  
555 large. For example, within the central eight degrees, the surface area in V1 is about 60% larger  
556 for the horizontal meridian than the vertical meridian [78]. Given that virtually all visual tasks  
557 must pass through V1 neurons, these cortical asymmetries are likely to have a large effect on  
558 perception. The number of cortical cells could be important for extracting information quickly  
559 [121], for increasing the signal-to-noise ratio, and for tiling visual space and visual features (*e.g.*,  
560 orientation, spatial frequency) more finely [122]. To know how the number of V1 neurons affect  
561 performance, there is a need for a computational model that explicitly links cortical resources to  
562 performance around the visual field.

### 563 Temporal summation in cone photocurrent accentuates polar angle 564 asymmetries

565 We found one physiological factor in the retina—gain control in the cone photocurrent—that  
566 appears to accentuate the polar angle asymmetries. This is because at matched eccentricities,  
567 cone density varies with polar angle (*i.e.*, cone density is higher on the horizontal meridian), and  
568 cone aperture size varies inversely with density. Specifically, at lower densities, the apertures  
569 are larger, capturing more photons per receptor. As a result of the higher absorption rates, there  
570 is greater downregulation of the photocurrent gain. Cottaris *et al.* [51] observed in their modeling  
571 work that the lower gain in the photocurrent for larger cones caused a reduction in the signal-to-  
572 noise ratio. In their simulations, this resulted in sensitivity loss for stimuli that extended further  
573 into the periphery. In our simulations, lower density results in lower sensitivity, therefore  
574 contributing to the difference in performance as a function of polar angle.

575 Overall, while adding a photocurrent stage decreases overall thresholds, bringing them  
576 closer to human performance (especially for simulations with low cone density mosaics), it still  
577 leaves a large gap between the predicted and observed psychophysical asymmetries as a  
578 function of polar angle. Moreover, the photocurrent model does not explain any of the vertical  
579 meridian asymmetry, as cone density, and presumably aperture size, do not differ between  
580 lower and upper vertical meridian in a way that matches behavior.

### 581 Model limitations

582 Despite implementing known facts about the eye, our model, like any model, is a simplification.  
583 The lack of comprehensiveness trades off with interpretability. For this model, we make the  
584 trade-off between complexity and understanding by treating a local patch of mRGCs as a linear,  
585 shift-invariant system (*i.e.*, a spatial filter). As several components of the model here are

586 identical to our previous model, we will focus on the limitations of those components that are  
587 different (addition of cone photocurrent and mRGC layer, and exclusion of eye movements),  
588 and refer to Kupers, Carrasco and Winawer [50] for model limitations related to the pathways  
589 from scene to cone absorptions and the inference engine.

#### 590 Spatial properties: Uniform sampling within a patch and subunits

591 Hexagonal cone arrays that include within-patch density gradients have been implemented in  
592 ISETBIO by Cottaris *et al.* (e.g., [51, 67]). Nonetheless, our mRGC layer is implemented as a  
593 rectangular patch of retina, initially with the same size as the cone mosaic. This allows for  
594 filtering by convolution and then linear subsampling to account for mRGC density, making the  
595 model computationally efficient. We do not incorporate several known complexities of RGC  
596 sampling in the retina: (i) density gradients within a patch, (ii) irregular sampling, and (iii) spatial  
597 RGC subunits. (i) Given our relatively small patch size ( $2 \times 2^\circ$  field-of-view) in the parafovea  
598 (centered at  $4.5^\circ$ ), the change in density across the patch would be small ( $\sim 10\%$ ). We found  
599 that a much larger change in mRGC density (spanning a 5-fold range) had only a modest effect  
600 on performance of our observer model, so it is unlikely that accounting for a small gradient  
601 within a patch would have significantly influenced our results. (ii) Given the relatively low spatial  
602 frequency content of our test stimulus (4 cycles per degree), it is unlikely that irregular sampling  
603 would have resulted in a substantial difference from the regular sampling we implemented. (iii)  
604 Our low spatial frequency test stimuli also reduce concerns of omitting spatial subunits [123-  
605 126], as these non-linearities are most likely to be important for stimuli at high spatial  
606 frequencies (reviewed by [127]). Moreover, we showed for our linear RGC filters that sensitivity  
607 differences are only large at high spatial frequencies (around 8 cycles per degree and higher);  
608 even when receptive field sizes differ by a factor of 3 (as shown in **Fig 4B**). Hence for the  
609 relatively low spatial frequency stimuli modeled here, the detailed spatial properties that we  
610 excluded would likely not have large enough effects to make up the difference between the  
611 predicted model performance and human behavior.

#### 612 Temporal properties and eye movements

613 In contrast to our previous work [50], our current model includes temporal integration but omits  
614 fixational eye movements and multiple cone types. The omission of eye movements made the  
615 model more tractable and the computations more efficient. We think this omission is unlikely to  
616 have a large effect on our results. In recent related work, it was shown that fixational eye

617 movements combined with temporal integration resulted in spatial blur and degraded  
618 performance, causing a loss in contrast sensitivity up to a factor of 2.5 [51]. However, the  
619 largest losses were for stimulus spatial frequencies over 8 cycles per degree, with little loss from  
620 eye movements for stimuli with lower peak spatial frequency (2-4 cycles per degree). Given that  
621 the spatial frequency of our test stimulus falls within this range, the influence of fixational eye  
622 movements on the computational observer performance would have been modest.

### 623 Noise implementation

624 Our expectation was that the largest effect of mRGCs on performance as a function of polar  
625 angle would arise from variation in cell density: where mRGC density is higher, SNR will be  
626 higher, thus performance will be better. This effect of density on performance emerged in our  
627 simulations from the noise added after spatial filtering, before subsampling: without this  
628 additional noise component, the spatial filtering of the mRGC would just be a linear transform of  
629 the cone outputs, which would have little or no effect on performance of a linear classifier. We  
630 simulated this late noise as additive Gaussian noise rather than the stochastic nature of spiking,  
631 as we were not trying to fit spiking data but rather predict behavior. While we also did not build  
632 in correlated noise between RGCs (e.g., [128]), there is nonetheless some shared noise in our  
633 mRGCs due to common inputs from cones, which is the major source of noise correlations in  
634 RGCs [129]. Moreover, we found that the general pattern of model performance was unchanged  
635 over a large range of noise levels (up to an overall scale factor in performance), suggesting that  
636 the effect of density is likely to hold in many noise regimes.

### 637 Other retinal cell types

638 Midgets are not the only retinal ganglion cells that process the visual field. Parasol (pRGCs) and  
639 bistratified retinal ganglion cells are less numerous but also cover the entire retina. pRGCs are  
640 the next most common retinal ganglion cells, and have generally larger cell bodies and dendritic  
641 field sizes than mRGCs, both increasing with eccentricity [54]. These differences cause  
642 parasols to be more sensitive to relative contrast changes and have higher temporal resolution,  
643 with the consequence of losing spatial resolution [130]. For this reason, the small mRGCs are  
644 much more likely to put a limit on spatial vision, and thus our model does not include pRGCs.

645 The discussion above raises the question, had we incorporated more known features of  
646 the retina in our model, would the model make predictions more closely matched to human  
647 performance? We think it is unlikely that doing so would fully explain the observed asymmetries



648 in behavior, because we measured substantially larger asymmetries in cortex than in retina. If  
649 the retinal simulations entirely accounted for behavior, this would leave no room for the  
650 additional cortical asymmetries on behavior.

## 651 A case for cortical contributions to visual performance asymmetries

652 Recent retinal modeling of contrast sensitivity in the fovea showed that very little information  
653 used for behavior seems to be lost from the retinal output [51]. This may not be the case for the  
654 parafovea and periphery. Incorporating temporal properties of phototransduction and spatial  
655 properties of mRGC followed by additive noise could explain about half the differences in  
656 behavior of HVA and  $\sim 1/6$  of VMA. These differences indicate a contribution from downstream  
657 processing, such as early visual cortex. V1 cortex has several characteristics that suggest a  
658 tight link between cortical topography and polar angle visual performance asymmetries. Hence  
659 a model that incorporates properties of early visual cortex is likely to provide a substantially  
660 better account of polar angle asymmetries in behavior than one that only incorporates properties  
661 of the eye. We have not developed such a model but outline some of the reasons that cortex-  
662 specific properties are important for explaining polar angle asymmetries.

663 First, the representation of the visual field is split across hemispheres in visual cortex  
664 along the vertical, but not horizontal meridian. This split may require longer temporal integration  
665 windows for visual input that spans the vertical meridian, as information needs to travel between  
666 hemispheres. For example, the response in the left visual word form area is delayed by  $\sim 100$   
667 ms compared to the right visual word form area when presenting a stimulus in the left visual  
668 field [131]. Longer integration windows may in turn impair performance on some tasks, as eye  
669 movements during integration will blur the representation. Longer integration time of visual  
670 information spanning the vertical meridian is consistent with behavior, as accrual time is slower  
671 when stimuli are presented at the vertical than the horizontal meridian [38]. Interestingly, the  
672 hemispheric split is not precise: there is some ipsilateral representation of the visual field along  
673 the vertical meridian in early visual cortex. The amount of ipsilateral coverage is larger along the  
674 lower than upper vertical meridian and increases from  $1-6^\circ$  eccentricity [132]. It is possible that  
675 the split representation affects performance for stimuli on the vertical meridian (contributing to  
676 the HVA), and that the asymmetry in ipsilateral coverage between the lower and upper vertical  
677 meridian contributes to the VMA.

678 Second, there is good correspondence between the angular patterns of asymmetries in  
679 V1 cortex and behavior. Polar angle asymmetries in the CMF of early visual cortex are largest

680 along the cardinal meridians (*i.e.*, horizontal vs vertical and upper vertical vs lower vertical). The  
681 asymmetries gradually fall-off with angular distance from the meridians [78]. This gradual  
682 decrease in polar angle asymmetry in cortex parallels the gradual decrease in contrast  
683 sensitivity [12, 29, 30] and spatial frequency sensitivity [16] with angular distance from the  
684 cardinal meridians. Measurements of cone density and retinal ganglion cell density have  
685 emphasized the meridians, so there is less information regarding how the asymmetries vary  
686 with angular distance from the meridians.

687 Third, there is good correspondence between cortical properties and behavior in the  
688 domain of spatial frequency and contrast sensitivity. Polar angle asymmetries in spatial  
689 frequency sensitivity observed by Barbot *et al.* [16] parallel spatial frequency tuning in V1 cortex.  
690 Specifically, fMRI measurements show that in V1, in behavior spatial frequency thresholds are  
691 higher on the horizontal than vertical visual meridian [16] and the preferred spatial frequency  
692 tuning is higher along the horizontal meridian than vertical visual meridian [133]. Additionally,  
693 polar angle asymmetries in contrast sensitivity covary with polar angle asymmetries in V1  
694 cortical magnification [103]: Observers with larger horizontal-vertical asymmetries in contrast  
695 sensitivity (*i.e.*, better performance on the horizontal vs vertical visual meridian at matched  
696 eccentricities), tend to have larger horizontal-vertical asymmetries in V1 cortical magnification at  
697 corresponding locations in the visual field.

698 Fourth, polar angle asymmetries in behavior are maintained when tested monocularly  
699 [12, 16], but thresholds are slightly higher compared to binocular testing (at least for spatial  
700 frequency sensitivity [16]). Higher thresholds (*i.e.*, poorer performance) show that performance  
701 benefits from combining information of the two eyes, as twice the amount of information  
702 increases the signal-to-noise ratio [134]. This summation is likely to arise in early visual cortex,  
703 as V1 is the first stage in the visual processing pathways where information of the left and right  
704 visual field merges [135-137].

## 705 Conclusion

706 Overall, we have shown that the well documented polar angle asymmetries in visual  
707 performance are associated with differences in the structural organization of cells throughout  
708 the early visual pathway. Polar angle asymmetries in cone density are amplified in downstream  
709 processing, from cones to RGCs and again from RGCs to early visual cortex. Further, we have  
710 extended our computational observer model to include temporal filtering when converting cone  
711 absorptions to photocurrent and spatial filtering of mRGCs, and found that both contributions,

712 although larger than those of cones, are far from explaining behavior. In future research, we will  
713 aim to integrate cortical data within the computational observer model to explain whether a  
714 significant amount of the polar angle asymmetries can be accounted for by the organization of  
715 cortical space in early visual cortex.

## 716 Methods

### 717 Reproducible computation and code sharing

718 All analyses were conducted in MATLAB (MathWorks, MA, USA). Data and code for our  
719 previously published and extended computational observer model, including density  
720 computations and figure scripts, are made publicly available via the Open Science Framework  
721 at the URL: <https://osf.io/mygvu/> (previously published) and <https://osf.io/ywu5v/> (this study).

### 722 Data sources

723 Data on cone density, midget RGC density, and V1 cortical surface area previously published or  
724 from publicly available analysis toolboxes. Both cone and mRGC densities were computed as  
725 cells/deg<sup>2</sup> for 0–40° eccentricities (step size 0.05°), at the cardinal meridians (0°, 90°, 180°, and  
726 270° polar angle, corresponding to nasal, superior, temporal, and inferior retina of the left eye.  
727 **Fig 1** contains averaged cone and mRGC densities across all meridians as a function of  
728 eccentricity. **Fig 2** contains cone and mRGC densities converted to visual field coordinates,  
729 where the horizontal visual field meridian is the average of nasal and temporal retina, upper  
730 visual field meridian corresponds to the inferior retina and lower visual field meridian to the  
731 superior retina.

### 732 Cone density

733 Cone density data for the main results were extracted from post-mortem retinal tissue of 8  
734 human retina's published by Curcio *et al.* [9] using the analysis toolbox ISETBIO [65-67],  
735 publicly available via GitHub (<https://github.com/isetbio/isetbio>).

736 Cone density in **Supplemental Fig 1** shows two datasets computed by two analysis  
737 toolboxes. To extract post-mortem data from Curcio *et al.* [9], we either use ISETBIO or the  
738 `rgcDisplacementMap` toolbox [76], publicly available at GitHub  
739 (<https://github.com/gkaguirrelab/rgcDisplacementMap>). A second cone density dataset comes  
740 from an adaptive optics study published by Song *et al.* [10]. From this work, we use "Group 1"  
741 (young individuals, 22-35 years old) implemented in ISETBIO.

742 Midget retinal ganglion cell receptive field density

743 Midget RGC density for the main results were computed with the quantitative model by Watson  
744 [64] implemented in ISETBIO. This model combines cone density data from Curcio *et al.* [9],  
745 mRGC cell body data from Curcio and Allen [53] and the displacement model by Drasdo *et al.*  
746 [57], to predict the midget RGC receptive fields (RFs).

747 Midget RGC data in **Supplemental Fig 1** computes mRGC density with two  
748 computational models: Watson [64] from ISETBIO and the displacement model by Barnett and  
749 Aguirre [76] implemented in the `rgcDisplacementMap` toolbox.

750 Cortical magnification factor in early visual cortex

751 To quantify the fovea-to-periphery gradient in the V1 cortical magnification factor (CMF), we  
752 used the areal CMF function published in Horton and Hoyt [68] for 0–40° eccentricity (Fig 1).  
753 Because this function does not make separate predictions for the cardinal meridians (Fig 2), we  
754 used data from the Human Connectome Project (HCP) 7 Tesla retinotopy dataset ( $n=163$ ),  
755 which were first published by Ugurbil, van Essen, and colleagues [138, 139] and analyzed with  
756 population receptive field models by Benson *et al.* [79]). V1 CMF surface area data are from  
757 Benson *et al.* [78] segmented into bins using hand-drawn ROIs from Benson *et al.* [140] and  
758 computed as follows.

759 To compute V1 CMF from retinotopy data, we used the extracted surface area for  $\pm 10^\circ$   
760 and  $\pm 20^\circ$  wedge ROIs centered on the cardinal meridians in each individual's hemisphere. The  
761 wedges on the horizontal, dorsal, and ventral locations represented the horizontal, lower, and  
762 upper visual field meridians respectively. Wedge ROIs were computed in the following steps:  
763 First, area V1 and V2 were manually labeled with iso-eccentricity and iso-polar angle contour  
764 lines using the measured retinotopic maps of each hemisphere [140]. Second, for each cardinal  
765 meridian and each 1°-eccentricity bin, we calculated the mean distance along the cortex to  
766 reach a 10° or 20° polar angle. All vertices that fell within the eccentricity bin and polar angle  
767 distance were included in the particular ROI. We computed wedge strips, rather than an entire  
768 wedge or line, to avoid localization errors in defining the exact boundaries.

769 The wedges were separated into 5 eccentricity bins between 1–6° (1° step size) using  
770 the hand-drawn ROIs from Benson *et al.* [140], marking eccentricity lines at 1°, 2°, 4°, and 7°.  
771 The 3°, 5° and 6° eccentricity lines were deduced from the 2°, 4° and 7° lines using isotropic  
772 interpolation (independently for  $\pm 10^\circ$  and  $\pm 20^\circ$  wedge ROIs, for more details see Benson *et al.*

773 [78]), and hence are likely to be less accurate than the data points at the exact hand-drawn  
774 eccentricity lines. The cortical surface area ( $\text{mm}^2$ ) was summed across hemispheres within each  
775 subject and divided by the visual field area ( $\text{deg}^2$ ). For each eccentricity bin and cardinal  
776 meridian, mean and standard error V1 CMF were computed from bootstrapped data across  
777 subjects (1,000 iterations). Mean data for each cardinal meridian were fit with a linear function in  
778 log-log space (*i.e.*, power law function in linear coordinates) for  $1\text{--}6^\circ$  eccentricity.

779         The initial ROIs used for the upper and lower vertical meridian included both V1 and V2  
780 sections of the vertical meridian, and therefore contain twice as much visual area as the  
781 horizontal ROI. To have a fair comparison between the horizontal and upper and lower visual  
782 field ROIs, we corrected the upper and lower ROIs as follows. For each subject and eccentricity  
783 bin, we computed a vertical surface area ROI (with both upper and lower visual fields) that  
784 excluded V2 sections of the vertical meridian. When summed over both hemispheres, this  
785 vertical ROI has a size comparable to the horizontal ROI. We then calculated a scale factor for  
786 each subject and eccentricity, by dividing the vertical ROI by the sum of upper and lower  
787 surface area ROIs. This scale factor was on average  $\sim 0.5$ . To get the corrected V1 CMF, we  
788 multiplied the scale factor to corresponding ventral and dorsal surface areas and divided by the  
789 corresponding visual field area. By scaling dorsal and ventral ROIs to only include the V1-side,  
790 we made the assumption that V2 is approximately the same size as V1. These vertical ROIs  
791 may be slightly less precise than the horizontal meridian ROI and affect the horizontal-vertical  
792 asymmetry (HVA). We did not compare differences in pRF sizes for the cardinal meridians.

793         Although the narrower  $\pm 10^\circ$  wedge ROIs are in closer correspondence to the single line  
794 estimations of cone and mRGC density, we use  $\pm 20^\circ$  wedge ROIs in **Fig 2** as those data are  
795 more robust. This is because narrow wedge ROIs are prone to overestimation of the vertical  
796 meridian surface, caused by ipsilateral representations near the boundaries. Such ipsilateral  
797 representations are sometimes incorrectly counted as part of the  $\pm 20^\circ$  ROI for the ipsilateral  
798 hemisphere, instead of as part of the  $\pm 10^\circ$  ROI for the contralateral hemisphere, and this effect  
799 is exacerbated for smaller wedges. We visualize V1 asymmetries for both  $\pm 10^\circ$  and  $\pm 20^\circ$  wedge  
800 ROI **Supplementary Fig 1**.

## 801 Convergence ratios

802         The cone:mRGC ratio was computed by dividing mRGC density ( $\text{cells}/\text{deg}^2$ ) by cone density  
803 ( $\text{cells}/\text{deg}^2$ ) for  $0\text{--}40^\circ$  eccentricity, in  $0.05^\circ$  bins. The mRGC:CMF ratio was computed in  
804  $\text{cells}/\text{mm}^2$ . When comparing mRGC density to Horton and Hoyt's CMF prediction, mRGC

805 density (cells/deg<sup>2</sup>) was divided by V1 CMF (deg<sup>2</sup>/mm<sup>2</sup>) for 0–40° eccentricity, in 0.05° bins.  
806 When comparing HCP’s retinotopy CMF to mRGC density, mRGC density was restricted to 1–  
807 6° eccentricity, and divided by the power law functions fitted to the V1 CMF. To compute the  
808 transformation ratios relative to horizontal visual field meridian for cone:mRGC or mRGC:V1  
809 CMF ratios in **Supplementary Fig 2**, we divide the lower and upper visual field transformation  
810 ratio separately by the horizontal visual field transformation ratio.

## 811 Asymmetry computation

812 Polar angle asymmetries between meridians for cone density and mRGC density were  
813 calculated as percent change in retinal coordinates as in Equation 1 and 2:

$$814 \text{ Horizontal Vertical Asymmetry} = 100 \cdot \frac{\text{mean}(\text{nasal,temporal}) - \text{mean}(\text{superior,inferior})}{\text{mean}(\text{nasal,temporal,superior,inferior})} \quad (\text{Eq 1})$$

$$815 \text{ Vertical Meridian Asymmetry} = 100 \cdot \frac{\text{superior} - \text{inferior}}{\text{mean}(\text{superior,inferior})} \quad (\text{Eq 2})$$

816 Polar angle asymmetries in V1 CMF and behavior were computed with the same equations, but  
817 for visual field coordinates (*i.e.*, nasal and temporal retina are left and right visual field  
818 meridians, and superior and inferior retina are lower and upper visual field meridians).

## 819 Computational observer model

820 The computational observer uses and extends a published model [50]. The extensions include  
821 (1) a phototransduction stage in the cone outer segment (transforming absorptions to  
822 photocurrent) and (2) a midget RGC layer (transforming photocurrent to mRGC responses)  
823 between the cone isomerization stage and the behavioral inference stage. To compensate for  
824 the increase in computational load and to keep the model tractable, we also made two  
825 simplifications: We used an L-cone only mosaic (instead of L-, M-, S-cone mosaic), and  
826 removed any stimulus location uncertainty by omitting fixational eye movements and stimulus  
827 phase shifts within a single stimulus orientation. With our extended model, we generated new  
828 cone absorption and photocurrent data using a fixed random number generator.

829         Given that several stages of the model are identical to those to the previous study, we  
830 refer to those methods on *Scene radiance*, *Retinal irradiance*, and *Cone mosaic and*  
831 *absorptions*. Unlike in our previous study [50], we did not vary the level of defocus in the *Retinal*  
832 *irradiance* stage nor the ratio of different cone types within a cone mosaic.

### 833 Stimulus parameters

834 The computational model simulates a 2-AFC orientation discrimination task while varying  
835 stimulus contrast. The stimulus parameters are chosen to match the baseline condition of the  
836 psychophysical study by Himmelberg *et al.* [15], whose results have replicated the  
837 psychophysical study used for comparison in our previous computational observer model [13].  
838 The recent psychophysics experiment used achromatic oriented Gabor patches,  $\pm 15^\circ$  oriented  
839 from vertical, with a spatial frequency of 4 cycles per degree. Stimuli were presented at  $4.5^\circ$  iso-  
840 eccentric locations on the cardinal meridians, with a size of  $3 \times 3^\circ$  visual angle ( $\sigma = 0.43^\circ$ ) and  
841 duration of 120 ms. These stimulus parameters were identical to those the model, except for  
842 size, duration, and phase randomization of the Gabor. The simulated stimulus by the model was  
843 smaller ( $2 \times 2^\circ$  visual angle ( $\sigma = 0.25^\circ$ ), shorter (54-ms on, 2-ms sampling) followed by a 164-ms  
844 blank period (mean luminance). We simulated these additional time points without a stimulus  
845 because photocurrent data are temporally delayed (see next section on *Photocurrent*). There  
846 was no stimulus onset period, and the phase of the Gabor patches were identical across all  
847 trials ( $90^\circ$ ). Instead of simulating 5 experiments with 200 trials per stimulus orientation as in our  
848 previous paper, we simulated one experiment with 5x more trials (*i.e.*, 1,000 trials per stimulus  
849 orientation, 2,000 trials in total) to ensure that our behavioral inference stage had sufficient  
850 number of trials to successfully learn and classify stimulus orientation. To assure psychometric  
851 functions with lower and upper asymptotes, stimulus contrasts ranged from 0.05-100%.

### 852 Photocurrent

853 After the cone isomerization stage, we applied ISETBIO's build-in *osLinear* photocurrent  
854 functionality implemented by Cottaris *et al.* [51] to our cone absorption data (separate for each  
855 simulation varying in cone density). This photocurrent stage converts cone excitations into  
856 photocurrent in pA in a linear manner (in contrast to the *osBiophys* functionality in ISETBIO  
857 which contains a more complex and computationally intensive biophysical model to calculate  
858 cone current).

859 The phototransduction stage takes the cone absorptions and applies three  
860 computations. First, it convolves cone absorptions trials with a linear temporal impulse response  
861 specific to L-cones (see **Fig 3**, panel in between absorptions and photocurrent stage). This  
862 temporal filter delays and blurs the cone photocurrent in time. Second, photocurrent gain is  
863 downregulated by light input, for instance due to increased luminance levels or larger cone  
864 apertures. Third, photocurrents are subject to an additional source of white Gaussian noise,



865 which are determined by photocurrent measurement by [80] (for more details, see Cottaris *et al.*  
866 [51]). This resulted in a 4D array with  $m$  rows by  $n$  columns by 109 2-ms time points by 2,000  
867 trials.

868 Because our simulated experiments do not contain any uncertainty about the stimulus  
869 location (no fixational eye movements or stimulus phase randomization), we were able to  
870 average both cone absorptions and photocurrent data across stimulus time points. We  
871 computed mean cone absorption data by taking the average across the first 54 ms (ignoring the  
872 time points without stimulus). For mean cone photocurrent data, we took a weighted mean  
873 across all 218 ms time points using a temporally delayed stimulus time course. This time course  
874 was constructed by convolving the stimulus on-off boxcar with the temporal photocurrent filter.  
875 This resulted in a 3D array with time-averaged cone photocurrent  $m$  rows by  $n$  columns by  
876 2,000 trials.

#### 877 Midget RGC layer

878 Prior to the mRGC layer, Gabor stimuli were simulated as spectral scene radiance from a visual  
879 display, passed through the simulated human optics, subject to isomerization and  
880 phototransduction by the cones in a rectangular mosaic ( $2 \times 2^\circ$  field-of-view) and saved as  
881 separate files for each stimulus contrast. The mRGC layer loaded the simulated 2D cone  
882 absorptions and photocurrent data.

883 The mRGC layer was built as a rectangular array, with the identical size mosaic as the  
884 cone mosaic ( $2 \times 2^\circ$ ). Spatial summation by RGC RFs was implemented as 2D Difference of  
885 Gaussians (DoG) filters [81, 82]. The DoG RF was defined on a support of 31 rows by 31  
886 columns. The DoG size was based on Croner and Kaplan [83]: the standard deviation of the  
887 center Gaussian ( $\sigma_c$ ) was 1/3 times the cone spacing and the standard deviation of the surround  
888 Gaussian ( $\sigma_s$ ) was 6 times the center standard deviation. The center/surround weights were  
889 0.64:0.36, hence unbalanced. These parameters create neighboring DoG RFs that overlap at  
890 1.3 standard deviation from their centers, approximating RGC tiling in human retina based on  
891 overlap of dendrites fields [55]. The support of the DoG filter did not change size, however,  
892 because the mRGC array is matched to the cone array and cone density affects cone spacing  
893 (*i.e.*, a lower cone density results in a sparser array), the width of the DoG varies with cone  
894 density and can be expressed in units of degree visual angle (*i.e.*, scaling with the number of  
895 cones per degree within the cone array).

896 In the primate fovea, there is one ON and one OFF mRGC cell per cone, for a ratio of 2  
897 mRGCs per cone. Unlike in the eye, our model mRGCs are not rectified, hence one of our  
898 mRGCs can signal either increments or decrements. For comparison to the literature, we  
899 multiply our mRGC counts by 2. We do not model on- and off-center mRGCs separately, but  
900 rather consider one linear mRGC (no rectification) as a pair of rectified on- and off-centers. For  
901 example, we consider an mRGC layer with no subsampling as having an mRGC:cone ratio of  
902 2:1 (2 mRGCs per cone). The mRGC:cone ratios, counted in this way, were 2:1, 0.5:1, 0.22:1,  
903 0.125:1, 0.08:1. The highest ratio (2:1) is similar to the observed in the fovea and the lowest  
904 ratio (0.08:1) is similar to the observed at  $\sim 40^\circ$  eccentricity [64]. We tested a wide range of  
905 ratios because the purpose of the modeling was to assess how variation in mRGC density  
906 affects performance. The relationships between cone density and performance, or between  
907 mRGC:cone ratio and performance, are more robustly assessed by testing a wide range of  
908 parameters.

909 The spatial computations of the mRGC layer were implemented in three stages. In the  
910 first stage, the 2D DoG filter was convolved with each time-averaged 2D cone photocurrent  
911 frame separately for each trial. The photocurrent images were padded to avoid border artifacts.  
912 We padded the array with the mean of the photocurrent cone array, where the padding doubled  
913 the width and height of the array. The post-convolution array maintained the same size as the  
914 cone array without padding.

915 In the second stage, white Gaussian noise was added to each time point of the filtered  
916 cone photocurrent response, sampled from a distribution with a standard deviation of 1. This  
917 noise level was determined after testing a range of values showed that doubling or halving the  
918 width of the Gaussian only scaled the absolute performance levels, not the effect as a function  
919 of cone density or mRGC:cone ratios (for results using a standard deviation of 0.5 and 2, see  
920 **Supplementary Fig 4**). We added noise to our mRGC responses at this stage, because our  
921 mRGC layer without noise would perform a linear transform of the photocurrent responses  
922 (linear filtering and linear subsampling). A transform that a linear support vector machine  
923 classifier should be able to learn the optimal hyperplane with enough training trials to “untangle”  
924 the two stimulus classes. This would mean that our model would not predict any loss of  
925 information introduced by the mRGC layer, the effect we are most interested in. Had we used a  
926 limited number of trials instead, our model would have performed suboptimally and showed  
927 differences in classification accuracy. In such case, it would be difficult to distinguish the extent

928 to which these performance differences are caused by spatial variations in mRGCs on visual  
929 performance versus the general ability of the SVM algorithm.

930 In the third stage, the filtered cone responses were linearly subsampled. This was  
931 implemented by resampling each row and column of the filtered cone responses with a sample  
932 rate equal to the mRGC:cone ratio. For instance, an array with an mRGC:cone ratio of 0.5:1  
933 samples from every other cone. The mRGCs are centered on the cones, limiting the resampling  
934 of filtered cone responses to integer numbers of cones. These spatially filtered and subsampled  
935 responses are the mRGC responses in arbitrary units, as we added an arbitrary level of  
936 Gaussian white noise on the filtered photocurrent responses and did not implement spiking non-  
937 linearity in this transformation.

### 938 Simulated experiments

939 A single simulated experiment had a total of 64,000 trials: 2,000 trials per contrast level, 1,000  
940 clockwise and 1,000 counter-clockwise. Stimulus contrast was systematically varied from 0 to  
941 100% Michelson contrast, using 32 contrast levels. The cone mosaic was identical across  
942 contrast levels, only including L-cones, cone density and cone spacing. There were no eye  
943 movements. Cone absorptions and photocurrent simulations used a fixed random number  
944 generator seed. Data from a single contrast level were represented as a 4D array ( $m$  rows by  $n$   
945 columns by 218 time points by 2,000 trials). The size of the  $m$  by  $n$  frame depended on the  
946 defined subsampling ratio used for the mRGC layer.

947 This single experiment was repeated for 17 different cone mosaics, which varied  
948 systematically in cone density and spacing. The cone density variation was implemented by  
949 simulating cone mosaics at different eccentricities, ranging from a density as high as at the  $1^\circ$   
950 ( $4.9 \times 10^3$  cells/deg<sup>2</sup>) to as low as at  $40^\circ$  eccentricity on the horizontal meridian ( $0.047 \times 10^4$   
951 cells/deg<sup>2</sup>). This resulted in a total of 1,088,000 simulated trials (64,000 trials x 17 cone  
952 densities).

953 Simulated experiments for each of the 17 different cone densities were averaged across  
954 time, resulting in a 3D array ( $m$  rows by  $n$  columns by 2,000 trials). In the mRGC layer, each 3D  
955 array was spatially subsampled by 5 different mRGC:cone ratios. This resulted in a total of  
956 5,440,000 simulated trials (64,000 trials x 17 cone densities x 5 ratios).

## 957 Inference engines

958 The simulated trials were fed into an inference engine. The task of the inference engine was to  
959 classify if a trial contained a clockwise or counter-clockwise oriented Gabor stimulus given the  
960 mRGC responses. Classification was performed separately for every 2,000 trials, *i.e.*,  
961 separately for each contrast level, cone density, and mRGC:cone ratio.

962 We used a linear SVM classifier as implemented in MATLAB's *fitcsvm* with 10-fold  
963 cross-validation and built-in z-scoring. This procedure is identical to our previously published  
964 model [50]. In contrast to our previous model implementation, we did not transform each 2D  
965 frame of mRGC responses to the Fourier domain and did not discard phase information prior to  
966 classification, because the stimulus was static and did not contain any uncertainty about  
967 stimulus location nor simulated fixational eye movements. The mRGC responses were  
968 concatenated across space, resulting in a matrix of 2,000 trials by mRGC responses. The order  
969 of the trials within this vector was randomized and fed into the linear SVM classifier with a set of  
970 stimulus labels. The classifier trained its weights on 90% of the trials, and tested on the 10%  
971 left-out trials. This resulted in accuracy (percent correct) for each given contrast level, cone  
972 density and ratio.

973 Accuracy data for a single simulated experiment were fitted with a Weibull function to  
974 extract the contrast threshold. The threshold was defined as the power of 1 over the slope of the  
975 Weibull function, which comes out approximately ~80% correct, given that chance is 50% for a  
976 2-AFC task and our slope was defined as  $\beta = 3$ .

## 977 Comparing model performance to behavior

978 To quantify the contribution of the spatial filtering by mRGCs, we compared the model  
979 performance to behavior reported by Himmelberg *et al.* [15]. To do so, we extracted the mean  
980 contrast thresholds across all simulated cone densities and mRGC:cone ratios. This resulted in  
981 a matrix of 17 cone densities x 5 mRGC:cone ratios. We placed these data points in a 3D  
982 coordinate space: log cone density (x-dimension) by log mRGC:cone ratio (y-dimension) by log  
983 contrast thresholds (z-dimension). We fitted a 3D mesh using a regression with locally weighted  
984 scatterplot smoothing with MATLAB's *fit.m* (using a LOWESS fit type with a span = 0.2, build-in  
985 normalization and the 'bisquare' robust fitting options). This 3D mesh fit is used to visualize the  
986 effect of cone density at a single mRGC:cone ratio by extracting a single curve from the mesh at  
987 that particular ratio (**Fig 6A**). We then used the 3D mesh fit to predict contrast thresholds for the

988 four cardinal meridians at 4.5° eccentricity, evaluating the model at the four observed [cone,  
989 mRGC:cone ratio]-density coordinates reported by Curcio *et al.* [9] and Watson [64].

990 Predicted thresholds for the model up to cone isomerizations and photocurrent were  
991 computed using contrast thresholds for each cone density. These data were fitted separately  
992 per model stage, with the same 3D mesh fit as mRGC responses using a dummy variable for  
993 the mRGC:cone ratio. This fit was used to predict thresholds for each model stage given the  
994 observed cone densities at the four cardinal meridians at 4.5° eccentricity.

995 Contrast thresholds were converted into contrast sensitivity by taking the reciprocal.  
996 Nasal and temporal retina were averaged to represent the horizontal meridian. Because cone  
997 density can vary dramatically across observers [141, 142], we computed error bars that  
998 represent the amount of variability in predicted sensitivity based on a difference in underlying  
999 cone density.

1000 The upper/lower bound of the error bars in cone and mRGC model predictions were  
1001 defined by assuming that our estimates of cone density on the meridians are imperfect.  
1002 Specifically, we assumed that the measured asymmetries might be off by as much as a factor of  
1003 2. So, for example, if the reported density for the horizontal meridian is 20% above the mean,  
1004 and for the vertical meridian is 20% below the mean, we considered the possibility that they  
1005 were in fact 40% above or below the mean, or 10% above or below the mean.

## 1006 References

- 1007 1. Wertheim T. Über die indirekte Sehschärfe. *Z Psychol, Physiol.* 1894;7:172-83.
- 1008 2. Ludvigh E. Extrafoveal acuity as measured with Snellen test-letters. *American Journal of*  
1009 *Ophthalmology.* 1941;24:225-33.
- 1010 3. Polyak SL. *The retina.* Press UoC, editor. Chicago 1941.
- 1011 4. Strasburger H, Rentschler I, Jüttner M. Peripheral vision and pattern recognition: a  
1012 review. *J Vis.* 2011;11(5):13. doi: 10.1167/11.5.13. PubMed PMID: 22207654.
- 1013 5. Hering E. *Beiträge zur Physiologie [Contributions to physiology].* Leipzig: Wilhelm  
1014 Engemann; 1861.
- 1015 6. von Helmholtz H. *Handbuch der physiologischen Optik.* Hamburg: Leopold Voss; 1896.
- 1016 7. Østerberg GA. Topography of the layer of rods and cones in the human retina. *Acta*  
1017 *Ophthalmologica.* 1935;13(6):1-102.
- 1018 8. Curcio CA, Sloan KR, Jr., Packer O, Hendrickson AE, Kalina RE. Distribution of cones in  
1019 human and monkey retina: individual variability and radial asymmetry. *Science.*  
1020 1987;236(4801):579-82. doi: 10.1126/science.3576186. PubMed PMID: 3576186.
- 1021 9. Curcio CA, Sloan KR, Kalina RE, Hendrickson AE. Human photoreceptor topography. *J*  
1022 *Comp Neurol.* 1990;292(4):497-523. doi: 10.1002/cne.902920402. PubMed PMID: 2324310.
- 1023 10. Song H, Chui TY, Zhong Z, Elsner AE, Burns SA. Variation of cone photoreceptor  
1024 packing density with retinal eccentricity and age. *Invest Ophthalmol Vis Sci.* 2011;52(10):7376-  
1025 84. doi: 10.1167/iovs.11-7199. PubMed PMID: 21724911; PubMed Central PMCID:  
1026 PMC3183974.
- 1027 11. Mackeben M. Sustained focal attention and peripheral letter recognition. *Spat Vis.*  
1028 1999;12(1):51-72. PubMed PMID: 10195388.
- 1029 12. Carrasco M, Talgar CP, Cameron EL. Characterizing visual performance fields: effects  
1030 of transient covert attention, spatial frequency, eccentricity, task and set size. *Spat Vis.*  
1031 2001;15(1):61-75. Epub 2002/03/15. PubMed PMID: 11893125; PubMed Central PMCID:  
1032 PMC3183974.
- 1033 13. Cameron EL, Tai JC, Carrasco M. Covert attention affects the psychometric function of  
1034 contrast sensitivity. *Vision Res.* 2002;42(8):949-67. Epub 2002/04/06. PubMed PMID:  
1035 11934448.
- 1036 14. Corbett JE, Carrasco M. Visual performance fields: frames of reference. *PLoS One.*  
1037 2011;6(9):e24470. doi: 10.1371/journal.pone.0024470. PubMed PMID: 21931727; PubMed  
1038 Central PMCID: PMC3169603.
- 1039 15. Himmelberg MM, Winawer J, Carrasco M. Stimulus-dependent contrast sensitivity  
1040 asymmetries around the visual field. *J Vis.* 2020;20(9):18. Epub 2020/09/29. doi:  
1041 10.1167/jov.20.9.18. PubMed PMID: 32986805; PubMed Central PMCID: PMC7533736.
- 1042 16. Barbot A, Xue S, Carrasco M. Asymmetries in visual acuity around the visual field. *J Vis.*  
1043 2021;21(1):2. Epub 2021/01/05. doi: 10.1167/jov.21.1.2. PubMed PMID: 33393963; PubMed  
1044 Central PMCID: PMC7794272.

- 1045 17. Talgar CP, Carrasco M. Vertical meridian asymmetry in spatial resolution: visual and  
1046 attentional factors. *Psychon Bull Rev.* 2002;9(4):714-22. doi: 10.1093/mnras/94.5.377. PubMed  
1047 PMID: 12613674.
- 1048 18. Fuller S, Carrasco M. Perceptual consequences of visual performance fields: the case of  
1049 the line motion illusion. *J Vis.* 2009;9(4):13 1-7. doi: 10.1167/9.4.13. PubMed PMID: 19757922;  
1050 PubMed Central PMCID: PMC3703960.
- 1051 19. Rovamo J, Virsu V. An estimation and application of the human cortical magnification  
1052 factor. *Exp Brain Res.* 1979;37(3):495-510. doi: 10.1007/BF00236819. PubMed PMID: 520439.
- 1053 20. Virsu V, Rovamo J. Visual resolution, contrast sensitivity, and the cortical magnification  
1054 factor. *Exp Brain Res.* 1979;37(3):475-94. PubMed PMID: 520438.
- 1055 21. Kroon JN, Rijdsdijk JP, van der Wildt GJ. Peripheral contrast sensitivity for sine-wave  
1056 gratings and single periods. *Vision Res.* 1980;20(3):243-52. doi: 10.1016/0042-6989(80)90109-  
1057 1. PubMed PMID: 7385598.
- 1058 22. Rijdsdijk JP, Kroon JN, van der Wildt GJ. Contrast sensitivity as a function of position on  
1059 the retina. *Vision Res.* 1980;20(3):235-41. doi: 10.1016/0042-6989(80)90108-X. PubMed PMID:  
1060 7385597.
- 1061 23. Robson JG, Graham N. Probability summation and regional variation in contrast  
1062 sensitivity across the visual field. *Vision Res.* 1981;21(3):409-18. doi: 10.1016/0042-  
1063 6989(81)90169-3. PubMed PMID: 7269319.
- 1064 24. Lundh BL, Lennerstrand G, Derefeldt G. Central and peripheral normal contrast  
1065 sensitivity for static and dynamic sinusoidal gratings. *Acta Ophthalmol (Copenh).*  
1066 1983;61(2):171-82. Epub 1983/04/01. doi: 10.1111/j.1755-3768.1983.tb01410.x. PubMed PMID:  
1067 6880630.
- 1068 25. Skrandies W. Human contrast sensitivity: regional retinal differences. *Hum Neurobiol.*  
1069 1985;4(2):97-9. PubMed PMID: 4030428.
- 1070 26. Seiple W, Holopigian K, Szlyk JP, Wu C. Multidimensional visual field maps:  
1071 relationships among local psychophysical and local electrophysiological measures. *J Rehabil*  
1072 *Res Dev.* 2004;41(3A):359-72. PubMed PMID: 15543452.
- 1073 27. Silva MF, Maia-Lopes S, Mateus C, Guerreiro M, Sampaio J, Faria P, et al. Retinal and  
1074 cortical patterns of spatial anisotropy in contrast sensitivity tasks. *Vision Res.* 2008;48(1):127-  
1075 35. doi: 10.1016/j.visres.2007.10.018. PubMed PMID: 18067943.
- 1076 28. Silva MF, Mateus C, Reis A, Nunes S, Fonseca P, Castelo-Branco M. Asymmetry of  
1077 visual sensory mechanisms: electrophysiological, structural, and psychophysical evidences. *J*  
1078 *Vis.* 2010;10(6):26. doi: 10.1167/10.6.26. PubMed PMID: 20884575.
- 1079 29. Abrams J, Nizam A, Carrasco M. Isoeccentric locations are not equivalent: the extent of  
1080 the vertical meridian asymmetry. *Vision Res.* 2012;52(1):70-8. Epub 2011/11/17. doi:  
1081 10.1016/j.visres.2011.10.016. PubMed PMID: 22086075; PubMed Central PMCID:  
1082 PMC3345502.
- 1083 30. Baldwin AS, Meese TS, Baker DH. The attenuation surface for contrast sensitivity has  
1084 the form of a witch's hat within the central visual field. *J Vis.* 2012;12(11). Epub 2012/10/30. doi:  
1085 10.1167/12.11.23. PubMed PMID: 23104816.
- 1086 31. Silva MF, d'Almeida OC, Oliveiros B, Mateus C, Castelo-Branco M. Development and  
1087 aging of visual hemifield asymmetries in contrast sensitivity. *J Vis.* 2014;14(12). doi:  
1088 10.1167/14.12.19. PubMed PMID: 25326605.

- 1089 32. Altpeter E, Mackeben M, Trauzettel-Klosinski S. The importance of sustained attention  
1090 for patients with maculopathies. *Vision Res.* 2000;40(10-12):1539-47. doi: 10.1016/S0042-  
1091 6989(00)00059-6. PubMed PMID: 10788657.
- 1092 33. Carrasco M, Williams PE, Yeshurun Y. Covert attention increases spatial resolution with  
1093 or without masks: support for signal enhancement. *J Vis.* 2002;2(6):467-79. doi: 10.1167/2.6.4.  
1094 PubMed PMID: 12678645.
- 1095 34. Montaser-Kouhsari L, Carrasco M. Perceptual asymmetries are preserved in short-term  
1096 memory tasks. *Atten Percept Psychophys.* 2009;71(8):1782-92. doi: 10.3758/APP.71.8.1782.  
1097 PubMed PMID: 19933562; PubMed Central PMCID: PMCPMC3697833.
- 1098 35. Fuller S, Rodriguez RZ, Carrasco M. Apparent contrast differs across the vertical  
1099 meridian: visual and attentional factors. *J Vis.* 2008;8(1):16 1-. doi: 10.1167/8.1.16. PubMed  
1100 PMID: 18318619; PubMed Central PMCID: PMCPMC2789458.
- 1101 36. Chaikin JD, Corbin HH, Volkman J. Mapping a field of short-time visual search.  
1102 *Science.* 1962;138(3547):1327-8. doi: 10.1126/science.138.3547.1327. PubMed PMID:  
1103 14019856.
- 1104 37. Krose BJ, Julesz B. The control and speed of shifts of attention. *Vision Res.*  
1105 1989;29(11):1607-19. PubMed PMID: 2635484.
- 1106 38. Carrasco M, Giordano AM, McElree B. Temporal performance fields: visual and  
1107 attentional factors. *Vision Res.* 2004;44(12):1351-65. doi: 10.1016/j.visres.2003.11.026.  
1108 PubMed PMID: 15066395.
- 1109 39. Rezec AA, Dobkins KR. Attentional weighting: a possible account of visual field  
1110 asymmetries in visual search? *Spat Vis.* 2004;17(4-5):269-93. PubMed PMID: 15559106.
- 1111 40. Pretorius LL, Hanekom JJ. An accurate method for determining the conspicuity area  
1112 associated with visual targets. *Hum Factors.* 2006;48(4):774-84. doi:  
1113 10.1518/001872006779166370. PubMed PMID: 17240724.
- 1114 41. Kristjansson A, Sigurdardottir HM. On the benefits of transient attention across the visual  
1115 field. *Perception.* 2008;37(5):747-64. doi: 10.1068/p5922. PubMed PMID: 18605148.
- 1116 42. Najemnik J, Geisler WS. Eye movement statistics in humans are consistent with an  
1117 optimal search strategy. *J Vis.* 2008;8(3):4 1-14. doi: 10.1167/8.3.4. PubMed PMID: 18484810;  
1118 PubMed Central PMCID: PMCPMC2868380.
- 1119 43. Najemnik J, Geisler WS. Simple summation rule for optimal fixation selection in visual  
1120 search. *Vision Res.* 2009;49(10):1286-94. doi: 10.1016/j.visres.2008.12.005. PubMed PMID:  
1121 19138697.
- 1122 44. Fortenbaugh FC, Silver MA, Robertson LC. Individual differences in visual field shape  
1123 modulate the effects of attention on the lower visual field advantage in crowding. *J Vis.*  
1124 2015;15(2). doi: 10.1167/15.2.19. PubMed PMID: 25761337; PubMed Central PMCID:  
1125 PMCPMC4327314.
- 1126 45. Toet A, Levi DM. The two-dimensional shape of spatial interaction zones in the  
1127 parafovea. *Vision Res.* 1992;32(7):1349-57. Epub 1992/07/01. doi: 10.1016/0042-  
1128 6989(92)90227-a. PubMed PMID: 1455707.
- 1129 46. He S, Cavanagh P, Intriligator J. Attentional resolution and the locus of visual  
1130 awareness. *Nature.* 1996;383(6598):334-7. doi: 10.1038/383334a0. PubMed PMID: 8848045.



- 1131 47. Greenwood JA, Szinte M, Sayim B, Cavanagh P. Variations in crowding, saccadic  
1132 precision, and spatial localization reveal the shared topology of spatial vision. *Proc Natl Acad*  
1133 *Sci U S A*. 2017;114(17):E3573-E82. Epub 2017/04/12. doi: 10.1073/pnas.1615504114.  
1134 PubMed PMID: 28396415; PubMed Central PMCID: PMC5410794.
- 1135 48. Roberts M, Cymerman R, Smith RT, Kiorpes L, Carrasco M. Covert spatial attention is  
1136 functionally intact in amblyopic human adults. *J Vis*. 2016;16(15):30. Epub 2016/12/30. doi:  
1137 10.1167/16.15.30. PubMed PMID: 28033433; PubMed Central PMCID: PMC5215291.
- 1138 49. Purokayastha S, Roberts M, Carrasco M. Voluntary attention improves performance  
1139 similarly around the visual field. *Atten Percept Psychophys*. 2021;83(7):2784-94. Epub  
1140 2021/05/27. doi: 10.3758/s13414-021-02316-y. PubMed PMID: 34036535; PubMed Central  
1141 PMCID: PMC8514247.
- 1142 50. Kupers ER, Carrasco M, Winawer J. Modeling visual performance differences 'around'  
1143 the visual field: A computational observer approach. *PLoS Comput Biol*. 2019;15(5):e1007063.  
1144 Epub 2019/05/28. doi: 10.1371/journal.pcbi.1007063. PubMed PMID: 31125331; PubMed  
1145 Central PMCID: PMC6553792.
- 1146 51. Cottaris NP, Wandell BA, Rieke F, Brainard DH. A computational observer model of  
1147 spatial contrast sensitivity: Effects of photocurrent encoding, fixational eye movements, and  
1148 inference engine. *J Vis*. 2020;20(7):17. Epub 2020/07/22. doi: 10.1167/jov.20.7.17. PubMed  
1149 PMID: 32692826; PubMed Central PMCID: PMC7424933.
- 1150 52. Drasdo N. Receptive field densities of the ganglion cells of the human retina. *Vision Res*.  
1151 1989;29(8):985-8. Epub 1989/01/01. doi: 10.1016/0042-6989(89)90113-2. PubMed PMID:  
1152 2629213.
- 1153 53. Curcio CA, Allen KA. Topography of ganglion cells in human retina. *J Comp Neurol*.  
1154 1990;300(1):5-25. Epub 1990/10/01. doi: 10.1002/cne.903000103. PubMed PMID: 2229487.
- 1155 54. Dacey DM, Petersen MR. Dendritic field size and morphology of midget and parasol  
1156 ganglion cells of the human retina. *Proc Natl Acad Sci U S A*. 1992;89(20):9666-70. doi:  
1157 10.1073/pnas.89.20.9666. PubMed PMID: 1409680; PubMed Central PMCID: PMC50193.
- 1158 55. Dacey DM. The mosaic of midget ganglion cells in the human retina. *J Neurosci*.  
1159 1993;13(12):5334-55. PubMed PMID: 8254378.
- 1160 56. Sjostrand J, Popovic Z, Conradi N, Marshall J. Morphometric study of the displacement  
1161 of retinal ganglion cells subserving cones within the human fovea. *Graefes Arch Clin Exp*  
1162 *Ophthalmol*. 1999;237(12):1014-23. Epub 2000/02/02. doi: 10.1007/s004170050338. PubMed  
1163 PMID: 10654171.
- 1164 57. Drasdo N, Millican CL, Katholi CR, Curcio CA. The length of Henle fibers in the human  
1165 retina and a model of ganglion receptive field density in the visual field. *Vision Res*.  
1166 2007;47(22):2901-11. Epub 2007/02/27. doi: 10.1016/j.visres.2007.01.007. PubMed PMID:  
1167 17320143; PubMed Central PMCID: PMC2077907.
- 1168 58. Liu Z, Kurokawa K, Zhang F, Lee JJ, Miller DT. Imaging and quantifying ganglion cells  
1169 and other transparent neurons in the living human retina. *Proc Natl Acad Sci U S A*.  
1170 2017;114(48):12803-8. Epub 2017/11/16. doi: 10.1073/pnas.1711734114. PubMed PMID:  
1171 29138314; PubMed Central PMCID: PMC5715765.
- 1172 59. Webb SV, Kaas JH. The sizes and distribution of ganglion cells in the retina of the owl  
1173 monkey. *Aotus trivirgatus*. *Vision Res*. 1976;16(11):1247-54. Epub 1976/01/01. doi:  
1174 10.1016/0042-6989(76)90049-3. PubMed PMID: 827113.

- 1175 60. Perry VH, Oehler R, Cowey A. Retinal ganglion cells that project to the dorsal lateral  
1176 geniculate nucleus in the macaque monkey. *Neuroscience*. 1984;12(4):1101-23. PubMed PMID:  
1177 6483193.
- 1178 61. Perry VH, Cowey A. The ganglion cell and cone distributions in the monkey's retina:  
1179 Implications for central magnification factors. *Vision Res*. 1985;25(12):1795-810.
- 1180 62. Wassle H, Grunert U, Rohrenbeck J, Boycott BB. Cortical magnification factor and the  
1181 ganglion cell density of the primate retina. *Nature*. 1989;341(6243):643-6. Epub 1989/10/19. doi:  
1182 10.1038/341643a0. PubMed PMID: 2797190.
- 1183 63. Leventhal AG, Rodieck RW, Dreher B. Retinal ganglion cell classes in the Old World  
1184 monkey: morphology and central projections. *Science*. 1981;213(4512):1139-42. Epub  
1185 1981/09/04. doi: 10.1126/science.7268423. PubMed PMID: 7268423.
- 1186 64. Watson AB. A formula for human retinal ganglion cell receptive field density as a  
1187 function of visual field location. *J Vis*. 2014;14(7). doi: 10.1167/14.7.15. PubMed PMID:  
1188 24982468.
- 1189 65. Farrell JE, Winawer J, Brainard DH, Wandell B. Modeling visible differences: The  
1190 computational observer model. *SID Symposium Digest of Technical Papers2014*. p. 352-6.
- 1191 66. Brainard DH, Jiang H, Cottaris NP, Rieke F, Chichilnisky EJ, Farrell JE, et al. ISETBIO:  
1192 Computational tools for modeling early human vision. *Imaging and Applied Optics 2015*;  
1193 2015/06/07; Arlington, Virginia: Optical Society of America; 2015.
- 1194 67. Cottaris NP, Jiang H, Ding X, Wandell BA, Brainard DH. A computational-observer  
1195 model of spatial contrast sensitivity: Effects of wave-front-based optics, cone-mosaic structure,  
1196 and inference engine. *J Vis*. 2019;19(4):8. doi: 10.1167/19.4.8. PubMed PMID: 30943530.
- 1197 68. Horton JC, Hoyt WF. The representation of the visual field in human striate cortex. A  
1198 revision of the classic Holmes map. *Archives of Ophthalmology*. 1991;109(6):816-24. PubMed  
1199 PMID: 2043069.
- 1200 69. Polyak S. The main afferent fiber systems of the cerebral cortex in primates. Berkeley:  
1201 University of California; 1932.
- 1202 70. Polyak S. A contribution of the cerebral representation of the retina. *The Journal of*  
1203 *Comparative Neurology*. 1933;57:541-617.
- 1204 71. Pointer JS. The cortical magnification factor and photopic vision. *Biol Rev Camb Philos*  
1205 *Soc*. 1986;61(2):97-119. Epub 1986/05/01. doi: 10.1111/j.1469-185x.1986.tb00463.x. PubMed  
1206 PMID: 3527286.
- 1207 72. Tolhurst DJ, Ling L. Magnification factors and the organization of the human striate  
1208 cortex. *Hum Neurobiol*. 1988;6(4):247-54. Epub 1988/01/01. PubMed PMID: 2832355.
- 1209 73. Adams DL, Horton JC. A precise retinotopic map of primate striate cortex generated  
1210 from the representation of angioscotomas. *J Neurosci*. 2003;23(9):3771-89. Epub 2003/05/09.  
1211 PubMed PMID: 12736348.
- 1212 74. Myerson J, Manis PB, Miezin FM, Allman JM. Magnification in striate cortex and retinal  
1213 ganglion cell layer of owl monkey: a quantitative comparison. *Science*. 1977;198(4319):855-7.  
1214 Epub 1977/11/25. doi: 10.1126/science.411172. PubMed PMID: 411172.
- 1215 75. Van Essen DC, Newsome WT, Maunsell JH. The visual field representation in striate  
1216 cortex of the macaque monkey: asymmetries, anisotropies, and individual variability. *Vision*

- 1217 Res. 1984;24(5):429-48. Epub 1984/01/01. doi: 10.1016/0042-6989(84)90041-5. PubMed  
1218 PMID: 6740964.
- 1219 76. Barnett M, Aguirre GK. A spatial model of human retinal cell densities and solution for  
1220 retinal ganglion cell displacement. Vision Sciences Society Annual Meeting; St. Pete Beach,  
1221 FL, USA: Journal of Vision; 2018. p. 23.
- 1222 77. Fahle M, Schmid M. Naso-temporal asymmetry of visual perception and of the visual  
1223 cortex. Vision Res. 1988;28(2):293-300. Epub 1988/01/01. doi: 10.1016/0042-6989(88)90157-5.  
1224 PubMed PMID: 3414016.
- 1225 78. Benson NC, Kupers ER, Barbot A, Carrasco M, Winawer J. Cortical magnification in  
1226 human visual cortex parallels task performance around the visual field. Elife. 2021;10. Epub  
1227 2021/08/04. doi: 10.7554/eLife.67685. PubMed PMID: 34342581; PubMed Central PMCID:  
1228 PMCPMC8378846.
- 1229 79. Benson NC, Jamison KW, Arcaro MJ, Vu AT, Glasser MF, Coalson TS, et al. The  
1230 Human Connectome Project 7 Tesla retinotopy dataset: Description and population receptive  
1231 field analysis. J Vis. 2018;18(13):23. Epub 2018/12/29. doi: 10.1167/18.13.23. PubMed PMID:  
1232 30593068; PubMed Central PMCID: PMCPMC6314247.
- 1233 80. Angueyra JM, Rieke F. Origin and effect of phototransduction noise in primate cone  
1234 photoreceptors. Nature neuroscience. 2013;16(11):1692-700. Epub 2013/10/08. doi:  
1235 10.1038/nn.3534. PubMed PMID: 24097042; PubMed Central PMCID: PMCPMC3815624.
- 1236 81. Rodieck RW. Quantitative analysis of cat retinal ganglion cell response to visual stimuli.  
1237 Vision Res. 1965;5(11):583-601. Epub 1965/12/01. doi: 10.1016/0042-6989(65)90033-7.  
1238 PubMed PMID: 5862581.
- 1239 82. Enroth-Cugell C, Robson JG. The contrast sensitivity of retinal ganglion cells of the cat.  
1240 J Physiol. 1966;187(3):517-52. Epub 1966/12/01. doi: 10.1113/jphysiol.1966.sp008107.  
1241 PubMed PMID: 16783910; PubMed Central PMCID: PMCPMC1395960.
- 1242 83. Croner LJ, Kaplan E. Receptive fields of P and M ganglion cells across the primate  
1243 retina. Vision Res. 1995;35(1):7-24. doi: 10.1016/0042-6989(94)E0066-T. PubMed PMID:  
1244 7839612.
- 1245 84. Green DG. Regional variations in the visual acuity for interference fringes on the retina. J  
1246 Physiol. 1970;207(2):351-6. Epub 1970/04/01. doi: 10.1113/jphysiol.1970.sp009065. PubMed  
1247 PMID: 5499023; PubMed Central PMCID: PMCPMC1348710.
- 1248 85. Williams DR. Aliasing in human foveal vision. Vision Res. 1985;25(2):195-205. Epub  
1249 1985/01/01. doi: 10.1016/0042-6989(85)90113-0. PubMed PMID: 4013088.
- 1250 86. Coletta NJ, Williams DR. Psychophysical estimate of extrafoveal cone spacing. J Opt  
1251 Soc Am A. 1987;4(8):1503-13. Epub 1987/08/01. PubMed PMID: 3625330.
- 1252 87. Williams DR, Coletta NJ. Cone spacing and the visual resolution limit. J Opt Soc Am A.  
1253 1987;4(8):1514-23. Epub 1987/08/01. PubMed PMID: 3625331.
- 1254 88. Anderson SJ, Hess RF. Post-receptoral undersampling in normal human peripheral  
1255 vision. Vision Res. 1990;30(10):1507-15. Epub 1990/01/01. doi: 10.1016/0042-6989(90)90031-f.  
1256 PubMed PMID: 2247960.
- 1257 89. Anderson SJ, Mullen KT, Hess RF. Human peripheral spatial resolution for achromatic  
1258 and chromatic stimuli: limits imposed by optical and retinal factors. J Physiol. 1991;442:47-64.  
1259 Epub 1991/10/01. PubMed PMID: 1798037; PubMed Central PMCID: PMCPMC1179877.

- 1260 90. Banks MS, Sekuler AB, Anderson SJ. Peripheral spatial vision: limits imposed by optics,  
1261 photoreceptors, and receptor pooling. *J Opt Soc Am A*. 1991;8(11):1775-87. Epub 1991/11/01.  
1262 PubMed PMID: 1744774.
- 1263 91. Sjostrand J, Olsson V, Popovic Z, Conradi N. Quantitative estimations of foveal and  
1264 extra-foveal retinal circuitry in humans. *Vision Res*. 1999;39(18):2987-98. Epub 2000/02/09. doi:  
1265 10.1016/s0042-6989(99)00030-9. PubMed PMID: 10664798.
- 1266 92. Popovic Z, Sjostrand J. Resolution, separation of retinal ganglion cells, and cortical  
1267 magnification in humans. *Vision Res*. 2001;41(10-11):1313-9. Epub 2001/04/27. doi:  
1268 10.1016/s0042-6989(00)00290-x. PubMed PMID: 11322976.
- 1269 93. Popovic Z, Sjostrand J. The relation between resolution measurements and numbers of  
1270 retinal ganglion cells in the same human subjects. *Vision Res*. 2005;45(17):2331-8. Epub  
1271 2005/06/01. doi: 10.1016/j.visres.2005.02.013. PubMed PMID: 15924946.
- 1272 94. Wilkinson MO, Anderson RS, Bradley A, Thibos LN. Neural bandwidth of veridical  
1273 perception across the visual field. *J Vis*. 2016;16(2):1. Epub 2016/01/30. doi: 10.1167/16.2.1.  
1274 PubMed PMID: 26824638; PubMed Central PMCID: PMC5833322.
- 1275 95. Anstis SM. Letter: A chart demonstrating variations in acuity with retinal position. *Vision*  
1276 *Res*. 1974;14(7):589-92. Epub 1974/07/01. doi: 10.1016/0042-6989(74)90049-2. PubMed  
1277 PMID: 4419807.
- 1278 96. Duncan RO, Boynton GM. Cortical magnification within human primary visual cortex  
1279 correlates with acuity thresholds. *Neuron*. 2003;38(4):659-71. PubMed PMID: 12765616.
- 1280 97. Carrasco M, Frieder KS. Cortical magnification neutralizes the eccentricity effect in  
1281 visual search. *Vision Res*. 1997;37(1):63-82. Epub 1997/01/01. doi: 10.1016/s0042-  
1282 6989(96)00102-2. PubMed PMID: 9068831.
- 1283 98. Carrasco M, McLean TL, Katz SM, Frieder KS. Feature asymmetries in visual search:  
1284 effects of display duration, target eccentricity, orientation and spatial frequency. *Vision Res*.  
1285 1998;38(3):347-74. Epub 1998/04/16. doi: 10.1016/s0042-6989(97)00152-1. PubMed PMID:  
1286 9536360.
- 1287 99. Schwarzkopf DS, Song C, Rees G. The surface area of human V1 predicts the  
1288 subjective experience of object size. *Nature neuroscience*. 2011;14(1):28-30. doi:  
1289 10.1038/nn.2706. PubMed PMID: 21131954; PubMed Central PMCID: PMC3012031.
- 1290 100. Liu T, Heeger DJ, Carrasco M. Neural correlates of the visual vertical meridian  
1291 asymmetry. *J Vis*. 2006;6(11):1294-306. Epub 2007/01/11. doi: 10.1167/6.11.12. PubMed  
1292 PMID: 17209736; PubMed Central PMCID: PMC5833322.
- 1293 101. Benson NC, Butt OH, Datta R, Radoeva PD, Brainard DH, Aguirre GK. The retinotopic  
1294 organization of striate cortex is well predicted by surface topology. *Current biology : CB*.  
1295 2012;22(21):2081-5. doi: 10.1016/j.cub.2012.09.014. PubMed PMID: 23041195; PubMed  
1296 Central PMCID: PMC3494819.
- 1297 102. Silva MF, Brascamp JW, Ferreira S, Castelo-Branco M, Dumoulin SO, Harvey BM.  
1298 Radial asymmetries in population receptive field size and cortical magnification factor in early  
1299 visual cortex. *Neuroimage*. 2018;167:41-52. doi: 10.1016/j.neuroimage.2017.11.021. PubMed  
1300 PMID: 29155078.
- 1301 103. Himmelberg MM, Winawer J, Carrasco M. Linking contrast sensitivity to cortical  
1302 magnification in human primary visual cortex. *bioRxiv*. 2021;10.04.463138. doi:  
1303 <https://doi.org/10.1101/2021.10.04.463138>.

- 1304 104. Daniel PM, Whitteridge D. The representation of the visual field on the cerebral cortex in  
1305 monkeys. *J Physiol.* 1961;159:203-21. Epub 1961/12/01. doi: 10.1113/jphysiol.1961.sp006803.  
1306 PubMed PMID: 13883391; PubMed Central PMCID: PMC1359500.
- 1307 105. Rolls ET, Cowey A. Topography of the retina and striate cortex and its relationship to  
1308 visual acuity in rhesus monkeys and squirrel monkeys. *Exp Brain Res.* 1970;10(3):298-310.  
1309 Epub 1970/01/01. doi: 10.1007/BF00235053. PubMed PMID: 4986000.
- 1310 106. Braccini C, Gambardella G, Sandini G, Tagliasco V. A model of the early stages of the  
1311 human visual system: functional and topological transformations performed in the peripheral  
1312 visual field. *Biol Cybern.* 1982;44(1):47-58. Epub 1982/01/01. doi: 10.1007/BF00353955.  
1313 PubMed PMID: 7093369.
- 1314 107. Schutt HH, Wichmann FA. An image-computable psychophysical spatial vision model. *J*  
1315 *Vis.* 2017;17(12):12. Epub 2017/10/21. doi: 10.1167/17.12.12. PubMed PMID: 29053781.
- 1316 108. Bradley C, Abrams J, Geisler WS. Retina-V1 model of detectability across the visual  
1317 field. *J Vis.* 2014;14(12). Epub 2014/10/23. doi: 10.1167/14.12.22. PubMed PMID: 25336179;  
1318 PubMed Central PMCID: PMC4204678.
- 1319 109. Watson AB, Ahumada AJ. Letter identification and the neural image classifier. *J Vis.*  
1320 2015;15(2). Epub 2015/03/12. doi: 10.1167/15.2.15. PubMed PMID: 25761333.
- 1321 110. Kwon M, Liu R. Linkage between retinal ganglion cell density and the nonuniform spatial  
1322 integration across the visual field. *Proc Natl Acad Sci U S A.* 2019;116(9):3827-36. Epub  
1323 2019/02/10. doi: 10.1073/pnas.1817076116. PubMed PMID: 30737290; PubMed Central  
1324 PMCID: PMC6397585.
- 1325 111. Himmelberg MM, Kurzawski JW, Benson NC, Pelli DG, Carrasco M, Winawer J. Cross-  
1326 dataset reproducibility of human retinotopic maps. *Neuroimage.* 2021;244:118609. Epub  
1327 2021/09/29. doi: 10.1016/j.neuroimage.2021.118609. PubMed PMID: 34582948; PubMed  
1328 Central PMCID: PMC8560578.
- 1329 112. Perry VH, Cowey A. The lengths of the fibres of Henle in the retina of macaque  
1330 monkeys: implications for vision. *Neuroscience.* 1988;25(1):225-36. Epub 1988/04/01. doi:  
1331 10.1016/0306-4522(88)90021-8. PubMed PMID: 3393279.
- 1332 113. Tootell RB, Switkes E, Silverman MS, Hamilton SL. Functional anatomy of macaque  
1333 striate cortex. II. Retinotopic organization. *The Journal of neuroscience : the official journal of*  
1334 *the Society for Neuroscience.* 1988;8(5):1531-68. Epub 1988/05/01. PubMed PMID: 3367210;  
1335 PubMed Central PMCID: PMC6569212.
- 1336 114. Andrews TJ, Halpern SD, Purves D. Correlated size variations in human visual cortex,  
1337 lateral geniculate nucleus, and optic tract. *The Journal of neuroscience : the official journal of*  
1338 *the Society for Neuroscience.* 1997;17(8):2859-68. PubMed PMID: 9092607.
- 1339 115. Kastner S, Schneider KA, Wunderlich K. Beyond a relay nucleus: neuroimaging views  
1340 on the human LGN. *Progress in brain research.* 2006;155:125-43. doi: 10.1016/S0079-  
1341 6123(06)55008-3. PubMed PMID: 17027384.
- 1342 116. Malpeli JG, Baker FH. The representation of the visual field in the lateral geniculate  
1343 nucleus of *Macaca mulatta*. *J Comp Neurol.* 1975;161(4):569-94. Epub 1975/06/15. doi:  
1344 10.1002/cne.901610407. PubMed PMID: 1133232.
- 1345 117. Connolly M, Van Essen D. The representation of the visual field in parvocellular and  
1346 magnocellular layers of the lateral geniculate nucleus in the macaque monkey. *J Comp Neurol.*  
1347 1984;226(4):544-64. Epub 1984/07/10. doi: 10.1002/cne.902260408. PubMed PMID: 6747034.

- 1348 118. Schein SJ, de Monasterio FM. Mapping of retinal and geniculate neurons onto striate  
1349 cortex of macaque. *The Journal of neuroscience : the official journal of the Society for*  
1350 *Neuroscience*. 1987;7(4):996-1009. Epub 1987/04/01. PubMed PMID: 3033167; PubMed  
1351 Central PMCID: PMCPMC6568992.
- 1352 119. Azzopardi P, Cowey A. Preferential representation of the fovea in the primary visual  
1353 cortex. *Nature*. 1993;361(6414):719-21. Epub 1993/02/25. doi: 10.1038/361719a0. PubMed  
1354 PMID: 7680108.
- 1355 120. Malpeli JG, Lee D, Baker FH. Laminar and retinotopic organization of the macaque  
1356 lateral geniculate nucleus: magnocellular and parvocellular magnification functions. *J Comp*  
1357 *Neurol*. 1996;375(3):363-77. Epub 1996/11/18. doi: 10.1002/(SICI)1096-  
1358 9861(19961118)375:3<363::AID-CNE2>3.0.CO;2-0. PubMed PMID: 8915836.
- 1359 121. Shriki O, Kohn A, Shamir M. Fast coding of orientation in primary visual cortex. *PLoS*  
1360 *Comput Biol*. 2012;8(6):e1002536. Epub 2012/06/22. doi: 10.1371/journal.pcbi.1002536.  
1361 PubMed PMID: 22719237; PubMed Central PMCID: PMCPMC3375217.
- 1362 122. Barlow HB. Single units and sensation: a neuron doctrine for perceptual psychology?  
1363 *Perception*. 1972;1(4):371-94. Epub 1972/01/01. doi: 10.1068/p010371. PubMed PMID:  
1364 4377168.
- 1365 123. Hochstein S, Shapley RM. Linear and nonlinear spatial subunits in Y cat retinal ganglion  
1366 cells. *J Physiol*. 1976;262(2):265-84. Epub 1976/11/01. doi: 10.1113/jphysiol.1976.sp011595.  
1367 PubMed PMID: 994040; PubMed Central PMCID: PMCPMC1307643.
- 1368 124. Demb JB, Haarsma L, Freed MA, Sterling P. Functional circuitry of the retinal ganglion  
1369 cell's nonlinear receptive field. *The Journal of neuroscience : the official journal of the Society*  
1370 *for Neuroscience*. 1999;19(22):9756-67. Epub 1999/11/13. PubMed PMID: 10559385; PubMed  
1371 Central PMCID: PMCPMC6782950.
- 1372 125. Schwartz GW, Okawa H, Dunn FA, Morgan JL, Kerschensteiner D, Wong RO, et al. The  
1373 spatial structure of a nonlinear receptive field. *Nature neuroscience*. 2012;15(11):1572-80. Epub  
1374 2012/09/25. doi: 10.1038/nn.3225. PubMed PMID: 23001060; PubMed Central PMCID:  
1375 PMCPMC3517818.
- 1376 126. Shah NP, Brackbill N, Rhoades C, Kling A, Goetz G, Litke AM, et al. Inference of  
1377 nonlinear receptive field subunits with spike-triggered clustering. *Elife*. 2020;9. Epub  
1378 2020/03/10. doi: 10.7554/eLife.45743. PubMed PMID: 32149600; PubMed Central PMCID:  
1379 PMCPMC7062463.
- 1380 127. Schwartz G, Rieke F. Perspectives on: information and coding in mammalian sensory  
1381 physiology: nonlinear spatial encoding by retinal ganglion cells: when 1 + 1 not equal 2. *J Gen*  
1382 *Physiol*. 2011;138(3):283-90. Epub 2011/08/31. doi: 10.1085/jgp.201110629. PubMed PMID:  
1383 21875977; PubMed Central PMCID: PMCPMC3171084.
- 1384 128. Pillow JW, Shlens J, Paninski L, Sher A, Litke AM, Chichilnisky EJ, et al. Spatio-  
1385 temporal correlations and visual signalling in a complete neuronal population. *Nature*.  
1386 2008;454(7207):995-9. Epub 2008/07/25. doi: 10.1038/nature07140. PubMed PMID: 18650810;  
1387 PubMed Central PMCID: PMCPMC2684455.
- 1388 129. Ala-Laurila P, Greschner M, Chichilnisky EJ, Rieke F. Cone photoreceptor contributions  
1389 to noise and correlations in the retinal output. *Nature neuroscience*. 2011;14(10):1309-16. Epub  
1390 2011/09/20. doi: 10.1038/nn.2927. PubMed PMID: 21926983; PubMed Central PMCID:  
1391 PMCPMC3183110.

- 1392 130. Shapley R, Perry VH. Cat and monkey retinal ganglion cells and their visual functional  
1393 roles. *Trends in Neurosciences*. 1986;9:229-35.
- 1394 131. Rauschecker AM, Bowen RF, Parvizi J, Wandell BA. Position sensitivity in the visual  
1395 word form area. *Proc Natl Acad Sci U S A*. 2012;109(24):E1568-77. doi:  
1396 10.1073/pnas.1121304109. PubMed PMID: 22570498; PubMed Central PMCID: PMC3386120.
- 1397 132. Gibaldi A, Benson NC, Banks MS. Crossed-uncrossed projections from primate retina  
1398 are adapted to disparities of natural scenes. *Proc Natl Acad Sci U S A*. 2021;118(7). Epub  
1399 2021/02/13. doi: 10.1073/pnas.2015651118. PubMed PMID: 33574061; PubMed Central  
1400 PMCID: PMC7896330.
- 1401 133. Aghajari S, Vinke LN, Ling S. Population spatial frequency tuning in human early visual  
1402 cortex. *J Neurophysiol*. 2020;123(2):773-85. Epub 2020/01/16. doi: 10.1152/jn.00291.2019.  
1403 PubMed PMID: 31940228; PubMed Central PMCID: PMC7052645.
- 1404 134. Campbell FW, Green DG. Monocular versus binocular visual acuity. *Nature*.  
1405 1965;208(5006):191-2. Epub 1965/10/09. doi: 10.1038/208191a0. PubMed PMID: 5884255.
- 1406 135. Hubel DH, Wiesel TN. Receptive fields, binocular interaction and functional architecture  
1407 in the cat's visual cortex. *J Physiol*. 1962;160:106-54. PubMed PMID: 14449617; PubMed  
1408 Central PMCID: PMC71359523.
- 1409 136. Banton T, Levi DM. Binocular summation in vernier acuity. *J Opt Soc Am A*.  
1410 1991;8(4):673-80. PubMed PMID: 2045969.
- 1411 137. Dougherty K, Cox MA, Westerberg JA, Maier A. Binocular Modulation of Monocular V1  
1412 Neurons. *Current biology : CB*. 2019;29(3):381-91 e4. doi: 10.1016/j.cub.2018.12.004. PubMed  
1413 PMID: 30661798; PubMed Central PMCID: PMC6363852.
- 1414 138. Ugurbil K, Xu J, Auerbach EJ, Moeller S, Vu AT, Duarte-Carvajalino JM, et al. Pushing  
1415 spatial and temporal resolution for functional and diffusion MRI in the Human Connectome  
1416 Project. *Neuroimage*. 2013;80:80-104. Epub 2013/05/25. doi:  
1417 10.1016/j.neuroimage.2013.05.012. PubMed PMID: 23702417; PubMed Central PMCID:  
1418 PMC740184.
- 1419 139. Van Essen DC, Smith SM, Barch DM, Behrens TE, Yacoub E, Ugurbil K, et al. The WU-  
1420 Minn Human Connectome Project: an overview. *Neuroimage*. 2013;80:62-79. doi:  
1421 10.1016/j.neuroimage.2013.05.041. PubMed PMID: 23684880; PubMed Central PMCID:  
1422 PMC3724347.
- 1423 140. Benson NC, Yoon JMD, Forenzo D, Engel SA, Kay KN, Winawer J. Variability of the  
1424 Surface Area of the V1, V2, and V3 Maps in a Large Sample of Human Observers. *BioRxiv*.  
1425 2021. doi: <https://doi.org/10.1101/2020.12.30.424856>.
- 1426 141. Roorda A, Williams DR. The arrangement of the three cone classes in the living human  
1427 eye. *Nature*. 1999;397(6719):520-2. Epub 1999/02/24. doi: 10.1038/17383. PubMed PMID:  
1428 10028967.
- 1429 142. Hofer H, Carroll J, Neitz J, Neitz M, Williams DR. Organization of the human trichromatic  
1430 cone mosaic. *The Journal of neuroscience : the official journal of the Society for Neuroscience*.  
1431 2005;25(42):9669-79. Epub 2005/10/21. doi: 10.1523/JNEUROSCI.2414-05.2005. PubMed  
1432 PMID: 16237171.
- 1433
- 1434

## 1435 Supplementary Material

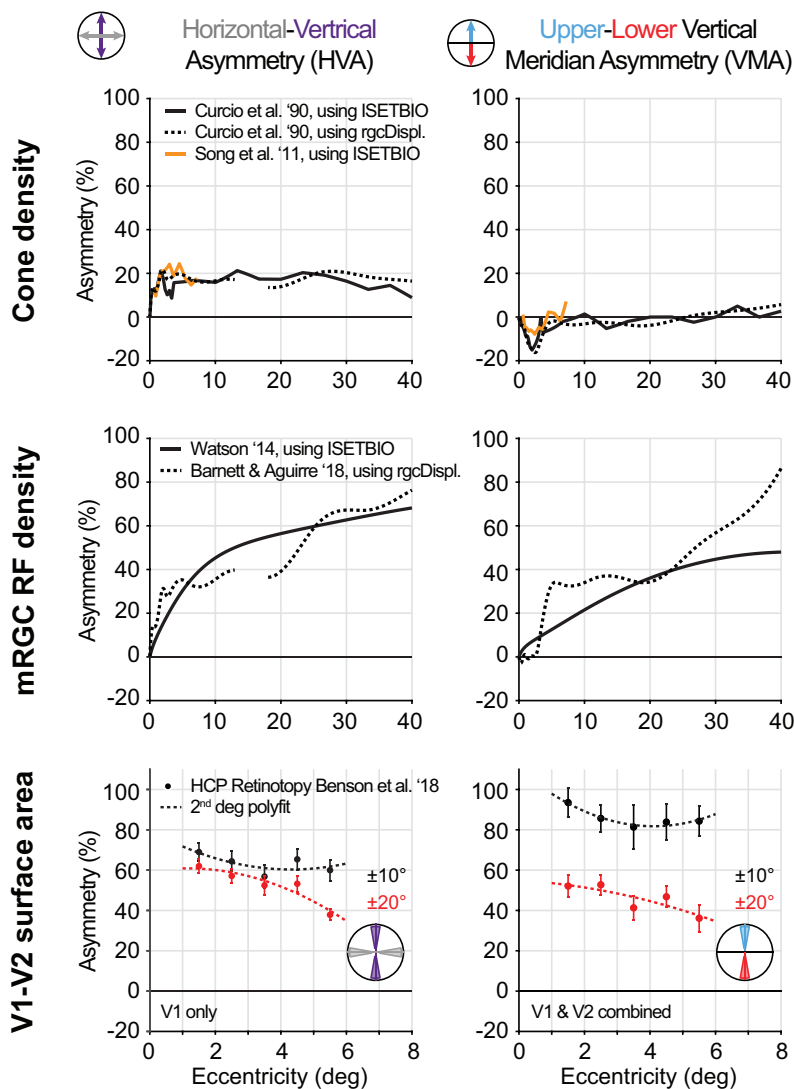

1436

1437 **Supplementary Fig 1. Polar angle asymmetries for cone density, mRGC density and V1-V2 surface area**  
 1438 **computed from different publicly available datasets.** Asymmetries are in percent change, calculated as the  
 1439 difference between horizontal and vertical meridians divided by their mean (left column), the difference between  
 1440 upper and lower vertical meridians divided by their means (right column). Positive asymmetries would positively  
 1441 correlate with observed differences in behavior. (Top row) Cone data are from either Curcio *et al.* [9] (black lines) or  
 1442 Song *et al.* [10] (orange line) computed with either ISETBIO (solid lines) or rgcDisplacementMap toolbox (dotted  
 1443 lines). (Middle row) Midget RGC RF data are computed using the computational model by Watson (2014)  
 1444 implemented in the ISETBIO toolbox (solid black line) or Barnett and Aguirre [76] implemented in the  
 1445 rgcDisplacementMap toolbox (dotted black line). (Bottom row) V1-V2 surface is computed from the Human  
 1446 Connectome Project 7T retinotopy dataset ( $n=163$ ), using the analyzed dataset by Benson *et al.* [78, 79]. Surface  
 1447 areas are defined as  $\pm 10^\circ$  (black) and  $\pm 20^\circ$  (red) wedge ROIs from 1-6° eccentricity around the meridians, avoiding  
 1448 the central one degree and stimulus border (7-8°) as those data can be noisy. Note that the x-axis is truncated as  
 1449 cortical measurements are limited by the field-of-view in the fMRI experiment. Data are fit with a 2<sup>nd</sup> degree  
 1450 polynomial,  $R^2 = 0.48$  ( $\pm 10^\circ$ ) and  $R^2 = 0.89$  ( $\pm 20^\circ$ ) for horizontal-vertical and  $R^2 = 0.94$  ( $\pm 10^\circ$ ) and  $R^2 = 0.72$  ( $\pm 20^\circ$ ) for  
 1451 vertical-meridian asymmetries).



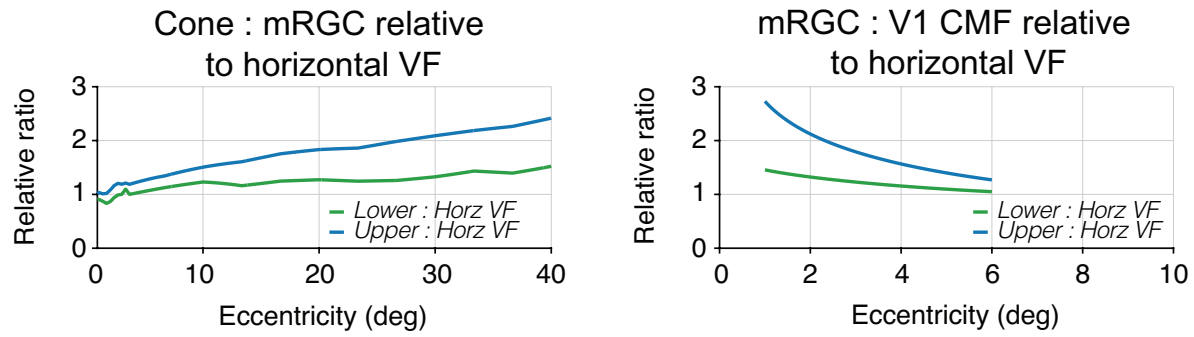

1452

1453

1454

1455

**Supplementary Fig 2. Transformation ratios relative to horizontal visual field meridian.** Relative ratio is computed taking the lower or upper visual field transformation ratio and horizontal visual field transformation ratio from panel B, and divide the two for cone:mRGC ratios (left panel) and mRGC:V1 CMF ratios (right panel).

1456

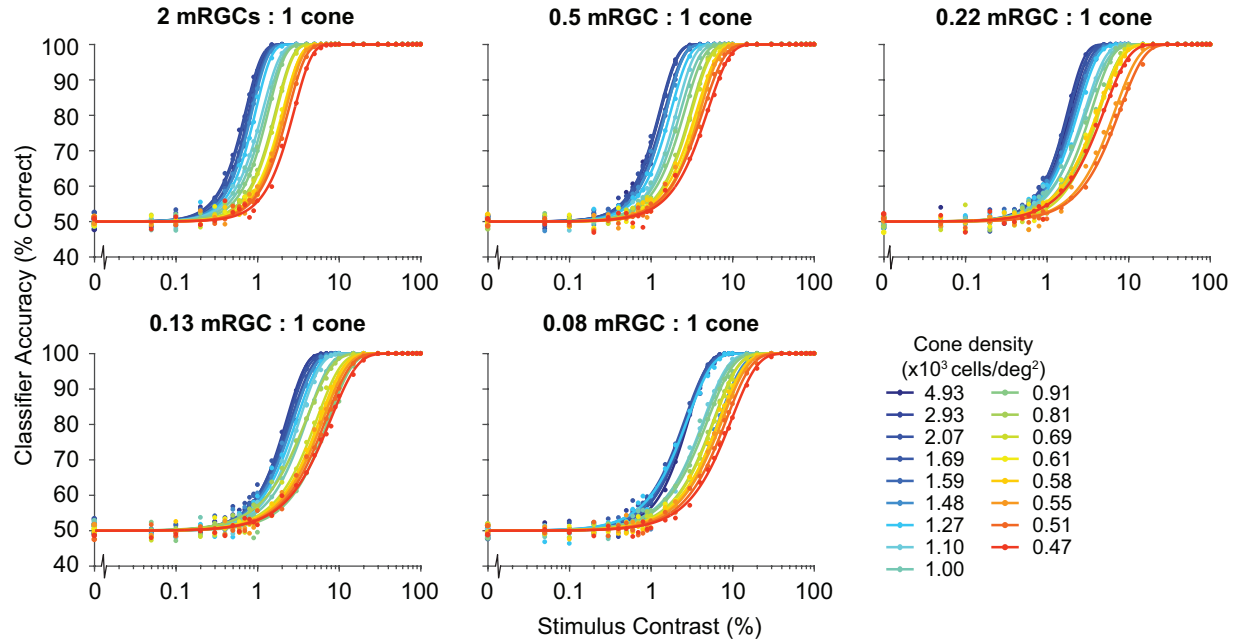

1457

1458

1459

1460

**Supplementary Fig 3. Classifier performance varying with cone density, separately for each mRGC:cone ratio.** Linear SVM classifier accuracy is computed for each contrast level in a simulated experiment with 1,000 clockwise and 1,000 counter-clockwise trials. Average accuracy data are fitted with a Weibull function.

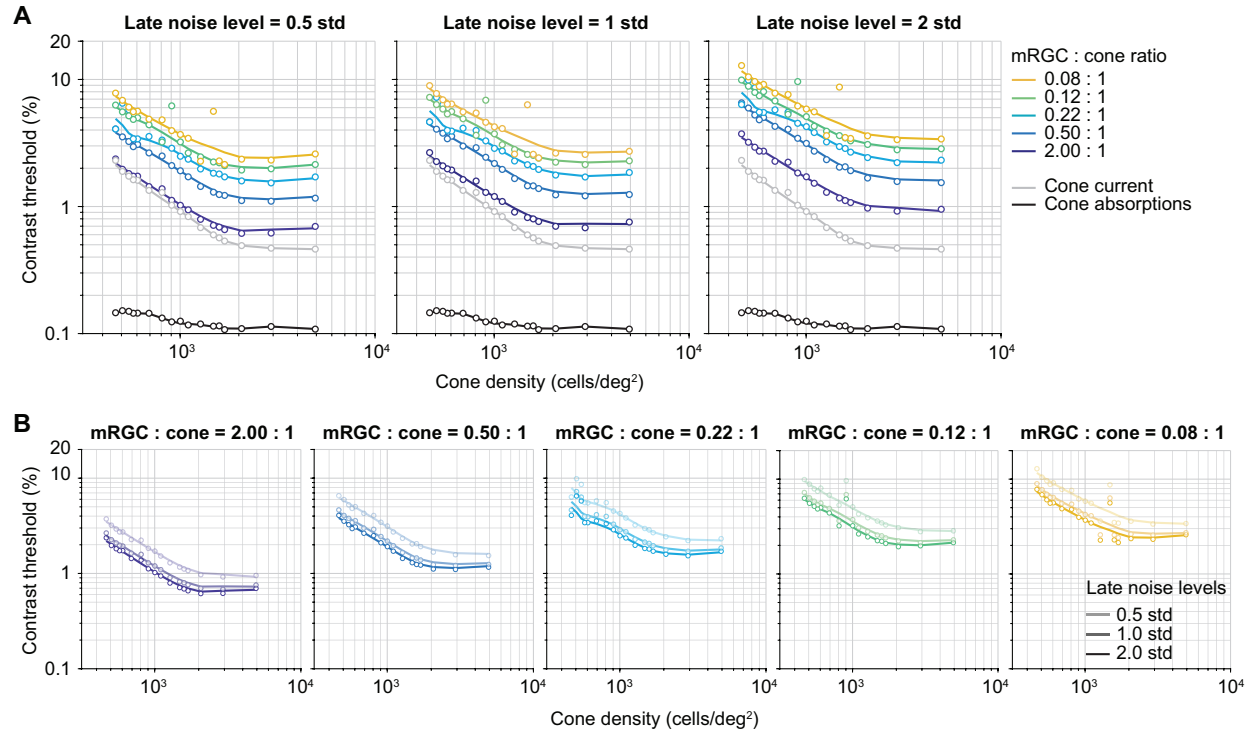

1461  
1462  
1463  
1464  
1465  
1466  
1467

**Supplementary Fig 4. The effect of noise in mRGC layer on contrast thresholds as a function of cone density, separately for each mRGC:cone ratio. (A)** Contrast thresholds as a function of cone density when adding white noise following a Gaussian distribution with a standard deviation of 0.5 (left panel), 1 (middle panel), 2 (right panel). Data are fit with a locally weighted regression using the same procedure as the fit shown in Fig 6. Middle panel (1 std) is identical to Fig 6A. **(B)** Same data as panel A, visualizing the three mRGC noise levels separately per mRGC:cone ratio. Decreasing opacity of fits and data correspond to decreasing levels of noise.
